1 **Functional instability allows access to DNA in longer Transcription Activator-Like**  
2 **Effector (TALE) arrays.**

3

4 Kathryn Geiger-Schuller<sup>1,2</sup>, Jaba Mitra<sup>3</sup>, Taekjip Ha<sup>1,4,5,6</sup>, & Doug Barrick<sup>1\*</sup>

5

6

7 <sup>1</sup>T.C. Jenkins Department of Biophysics and Program in Molecular Biophysics, Johns  
8 Hopkins University, 3400 N. Charles St, Baltimore MD 21218.

9 <sup>2</sup>Current address: Broad Institute of Harvard and Massachusetts Institute of  
10 Technology, Cambridge, MA 02142.

11 <sup>3</sup>Materials Science and Engineering, University of Illinois Urbana-Champaign, Urbana IL  
12 61801.

13 <sup>4</sup>Department of Physics, Center for the Physics of Living Cells and Institute for Genomic  
14 Biology, University of Illinois at Urbana Champaign, Urbana IL 61801.

15 <sup>5</sup>Department of Biophysics and Biophysical Chemistry and Department of Biomedical  
16 Engineering, Johns Hopkins University, Baltimore MD 21205.

17 <sup>6</sup>Howard Hughes Medical Institute, Baltimore, MD, 21205, USA

18

19 \*Corresponding Author: barrick@jhu.edu, (410) 516-0409

20

21 Keywords: TALE repeat, Single-molecule biophysics, FRET, Functional instability,

22 Deterministic modeling

23 **Abstract**

24           Transcription activator-like effectors (TALEs) bind DNA through an array of  
25 tandem 34-residue repeats. Here, we examine the kinetics of DNA binding for a set of  
26 TALE arrays with varying numbers of identical repeats using single molecule  
27 microscopy. Using a new deterministic modeling approach, we find evidence for  
28 conformational heterogeneity in both the free- and DNA-bound TALE arrays. Combined  
29 with previous work demonstrating populations of partly folded TALE states, our findings  
30 reveal a functional instability in TALE-DNA binding. For TALEs forming less than one  
31 superhelical turn around DNA, partly folded open states inhibit DNA binding. In contrast,  
32 for TALEs forming more than one turn, the partly folded open states facilitate DNA  
33 binding. Overall, we find that increasing repeat number results in significantly slower  
34 interconversion between the various DNA-free and DNA-bound states. These findings  
35 highlight the role of conformational heterogeneity and dynamics in facilitating  
36 macromolecular complex assembly.

37

## 38 **Impact Statement**

39 Single molecule DNA-binding trajectories and deterministic modeling analyses  
40 demonstrate a functional role for high energy partly folded states in Transcription  
41 Activator-Like Effectors (TALEs) that could improve future TALEN design.

42

## 43 **Introduction**

44 Transcription activator-like effectors (TALEs) are bacterial proteins containing a  
45 domain of tandem DNA-binding repeats as well as a eukaryotic transcriptional activation  
46 domain (Kay et al., 2007; Römer et al., 2007). The repeat domain binds double  
47 stranded DNA with a register of one repeat per base pair. Specificity is determined by  
48 the sequence identity at positions twelve and thirteen in each TALE repeat, which are  
49 referred to as repeat variable diresidues (RVDs) (Boch et al., 2009; Miller et al., 2015;  
50 Moscou and Bogdanove, 2009). This specificity code has enabled design of TALE-  
51 based tools for transcriptional control (Cong et al., 2012; Geissler et al., 2011; Li et al.,  
52 2012; Mahfouz et al., 2012; Zhang et al., 2011), DNA modifications (Maeder et al.,  
53 2013), in-cell microscopy (Ma et al., 2013; Miyanari et al., 2013), and genome editing  
54 (TALENs) (Christian et al., 2010; Li et al., 2011).

55 TALE repeat domains wrap around DNA in a continuous superhelix of 11.5 TALE  
56 repeats per turn (Deng et al., 2012; Mak et al., 2012). Because TALEs contain on  
57 average 17.5 repeats (Boch and Bonas, 2010), most form over 1.5 full turns around  
58 DNA. Many multisubunit proteins that form rings around DNA require energy in the form  
59 of ATP to open or close around DNA (reviewed in O'Donnell and Kuriyan, 2006), yet

60 TALEs are capable of wrapping around DNA without energy from nucleotide  
61 triphosphate hydrolysis. One possibility is that TALEs bind DNA through an  
62 energetically accessible open conformation. Consistent with this possibility, we  
63 previously demonstrated that TALE arrays can populate partly folded or broken states  
64 (Geiger-Schuller and Barrick, 2016). While the calculated populations of partly folded  
65 states in TALE repeat arrays are small, these populations are many orders of  
66 magnitude larger than calculated populations of partly folded states in other previously  
67 studied repeat arrays (consensus Ankyrin (Aksel et al., 2011) and DHR proteins  
68 (Geiger-Schuller et al., 2018)) suggesting a potential functional role for the high  
69 populations of partially folded states in TALE repeat arrays.

70 Consensus TALEs (cTALEs) are homopolymeric arrays composed of the most  
71 commonly observed residue at each of the 34 positions of the repeat (Geiger-Schuller  
72 and Barrick, 2016). In addition to simplifying analysis of folding and conformational  
73 heterogeneity in this study, the consensus approach simplifies analysis of DNA binding,  
74 eliminating contributions from sequence heterogeneity and providing an easy means of  
75 site-specific labeling.

76 Here we characterize DNA binding kinetics of cTALEs using total internal  
77 reflection fluorescence single-molecule microscopy. We find that consensus TALE  
78 arrays bind to DNA reversibly, with high affinity. Analysis of the dwell-times of the on-  
79 and off-states reveals multiphasic binding and unbinding kinetics, suggesting  
80 conformational heterogeneity in both the free and DNA bound state. We develop a  
81 deterministic optimization analysis that supports such a model, and provides rate

82 constants for both conformational changes and binding. Comparing the dynamics  
83 observed here to previously characterized local unfolding suggests that locally unfolded  
84 states inhibit binding of short cTALE arrays (less than one full superhelical turn around  
85 DNA), whereas they promote binding of long arrays (more than 1 full superhelical turn).  
86 Whereas local folding of transcription factors upon DNA binding is well documented  
87 (Spolar and Record, 1994), local unfolding in the binding process has not. Our results  
88 present a new mode of transcription factor binding where the major conformer in the  
89 unbound state is fully folded, requiring partial unfolding prior to binding. The critical role  
90 of such high energy partly folded states is an exciting example of functional instability.

91

## 92 **Results**

### 93 **cTALE design**

94 Consensus TALE (cTALE) repeat sequence was design previously described  
95 (Geiger-Schuller and Barrick, 2016). To avoid self- association of cTALE arrays, we  
96 fused arrays to a conserved N-terminal extension of the PthXo1 gene. Although the  
97 sequence of this domain differs from a TALE repeat sequence, the structure of this  
98 domain closely mimics four TALE repeats (Gao et al., 2012; Mak et al., 2012) and is  
99 required for full transcriptional activation (Gao et al., 2012). In this study, all repeat  
100 arrays contain this solubilizing N-terminal domain.

101

### 102 **cTALE local instability promotes population of partly folded states**

103           Figure 1A depicts types of partly folded states of a generic repeat protein. In the  
104 fully folded state, all repeats are folded, and all interfaces are intact. In the end-frayed  
105 states, one or more terminal repeats are unfolded and all interfaces, except the  
106 interface(s) between the unfolded and adjacent folded repeat(s), are intact. In the  
107 internally unfolded states, a central repeat is unfolded and all interfaces, except the  
108 interfaces involving the unfolded repeats, are intact. In the interfacially ruptured state, all  
109 repeats are folded but one interface is disrupted due to local structural distortion.

110           Figure 1B shows calculated free energy differences between various partly  
111 folded states and the fully folded repeat array for two different RVDs (NS and HD) in an  
112 otherwise identical consensus sequence background, using the intrinsic and interfacial  
113 energies we determined previously (Geiger-Schuller and Barrick, 2016). The distribution  
114 of partly folded states is calculated for different 20-repeat arrays containing two types of  
115 TALE arrays (with the NS RVD in red and with the HD RVD in blue) as well as  
116 consensus ankyrin arrays (cAnk in black). For cTALE arrays, end frayed states are  
117 within a few *RT* of the folded state, internally unfolded states are highest in energy, and  
118 interfacially ruptured states fall energetically between end frayed and internally unfolded  
119 states.

120           Changing the RVD sequence affects the distribution of these partly folded states:  
121 HD repeat containing arrays are more likely to internally unfold or interfacially rupture  
122 than NS repeat containing arrays. However, both types of cTALEs are more likely to  
123 populate many of these partly folded states than cAnk is to populate even the lowest  
124 energy partly folded state, the end frayed state. Thus, compared to ankyrin repeats,

125 cTALEs are locally unstable, meaning they are likely to form partly folded states. As  
126 these states disrupt the superhelix, they may facilitate DNA binding.

127

## 128 **Single-molecule studies of cTALE binding to DNA**

129 To ask if cTALE local instability is relevant for DNA binding kinetics, DNA binding  
130 trajectories were measured using single molecule total internal reflection fluorescence  
131 (smTIRF). Figure 2A shows a schematic of the smTIRF experiments performed to  
132 measure DNA binding. For site-specific cTALE labeling, R30 is mutated to cysteine in a  
133 single repeat. Position 30 is frequently a cysteine in naturally occurring TALEs (in earlier  
134 folding studies, arginine was chosen in the consensus sequence to avoid disulfide  
135 formation) (Geiger-Schuller and Barrick, 2016). This cysteine was Cy3 (FRET donor)-  
136 labelled using maleimide chemistry, and was attached to biotinylated slides via the C-  
137 terminal His<sub>6</sub> tag and  $\alpha$ -Penta•His antibodies. At salt concentrations below 300 mM  
138 NaCl, cTALEs aggregate. Because DNA binding is weak at high salt concentrations,  
139 measuring binding kinetics in bulk at high salt is not possible. However, tethering  
140 cTALEs to the quartz slide at high salt prevents self-association, even at the low salt  
141 concentrations required to study DNA binding kinetics. A histogram of NcTALE<sub>8</sub> (8 NS-  
142 type repeats and the N-terminal domain) labeled via a cysteine in the first repeat shows  
143 a single peak at zero FRET efficiency, as expected for donor-only constructs (Figure  
144 2B).

145 To test for DNA binding to tethered cTALE constructs, we added Cy5 (FRET  
146 acceptor)-labeled 15 bp-long DNA (Cy5.A<sub>15</sub>/T<sub>15</sub>) to tethered NcTALE<sub>8</sub>. This results in a

147 new peak at a FRET efficiency of 0.45, indicating that DNA binds directly to cTALE  
148 arrays. As DNA concentration in solution is increased, the peak at 0.45 FRET efficiency  
149 increases in population (Figure 2C-D), suggesting a measurable equilibrium between  
150 free and bound DNA rather than saturation or irreversible binding. In support of this,  
151 single molecule time trajectories show interconversion between bound and unbound  
152 states, providing access to rates of binding and dissociation.

153 As expected for reversible complex formation, the peak at 0.45 FRET efficiency  
154 can be competed away by adding mixtures of labeled and unlabeled DNA to pre-formed  
155 cTALE-labelled DNA complexes (schematic shown in Figure 2E; pre-formed complex  
156 shown in Figure 2F, competition data shown in Figure 2G-H). Challenging pre-formed  
157 complexes with a mixture of 5 nM unlabeled DNA and 15 nM labeled DNA results in a  
158 slight decrease in the population of the peak at 0.45 FRET (compare Figures 2F and  
159 2G). Challenging with a mixture of 50 nM unlabeled DNA and 15 nM labeled DNA  
160 further decreases the peak at 0.45 FRET (Figure 2H).

161

### 162 **cTALE arrays display multiphasic DNA-binding kinetics.**

163 In addition to the short smTIRF movies used to generate smFRET histograms  
164 from many molecules, long movies were also collected to examine the extended  
165 transitions of individual molecules between the low- and high-FRET (0 and 0.45) (Figure  
166 3A-B). A transition from low to high FRET (0 to 0.45) indicates that the acceptor  
167 fluorophore on DNA moved close enough to the donor on the protein for FRET and is  
168 likely a binding event. A transition from high to low FRET (0.45 to 0.0) indicates the



169 acceptor fluorophore on DNA moved too far away from the donor on the protein for  
170 FRET and is likely an unbinding event. Low-FRET states show low colocalization with  
171 signal upon direct excitation of the acceptor, confirming that high-FRET states are DNA-  
172 bound states and low-FRET states are DNA-free states (Figure 3- figure supplement 1).  
173 These long single molecule traces show both long- and short-lived low- and high-FRET  
174 states, indicating that kinetics are multi-phasic (Figure 3A-B). Binding events (transitions  
175 from low to high FRET) become more frequent as bulk DNA concentration increases  
176 (compare representative traces at 1 nM dsDNA to 15 nM dsDNA; Figure 3A and Figure  
177 3B). Cumulative distributions generated from dwell times in the low FRET state at a  
178 given DNA concentration are best-fit by a double-exponential decay, indicating a  
179 minimum of two kinetic phases associated with binding events (Figure 3C). Cumulative  
180 distributions generated from dwell times in the high FRET state are best-fit by a double-  
181 exponential decay, indicating that there are a minimum of two kinetic phases for  
182 unbinding as well (Figure 3D).

183 The rate constant for the fast phase in DNA binding shows a linear increase with  
184 DNA concentration (Figure 3E), indicating that this step involves an associative binding  
185 mechanism. The slope of these rate constants as a function of DNA concentration gives  
186 a bimolecular rate constant of  $5.9 \times 10^8 \text{ nM}^{-1} \text{ s}^{-1}$ , close to the diffusion limit. The rate  
187 constant for the slower phase ( $0.59 \text{ s}^{-1}$ ) is independent of DNA concentration indicating  
188 a unimolecular isomerization mechanism (Figure 3E).

189 In contrast, neither of the two fitted rate constants for transitions from high to low  
190 FRET (0.45 to 0.0; unbinding events) depends on DNA concentration, suggesting that

191 unbinding involves two (or more) unimolecular processes (Figure 3F). The rate  
192 constants of these two phases are  $1.2 \text{ s}^{-1}$  and  $0.13 \text{ s}^{-1}$  respectively.

193 To rule out kinetic contributions of TALEs threading axially onto the ends of short  
194 DNAs, binding kinetics were measured with capped double-helical DNA sites. Capped  
195 DNA was generated by forming 5'-digoxigenin-A<sub>5</sub>-Cy5-A<sub>15</sub> duplexed with 5'-digoxigenin-  
196 T<sub>26</sub> and adding a three-fold molar excess of anti-Digoxigenin. Low and high FRET dwell  
197 time cumulative distributions generated from capped DNA-binding kinetics are bi-  
198 phasic, similar to distributions from uncapped DNA (Figure 3- figure supplement 2). The  
199 DNA concentration-independent rate constant for binding is roughly the same for  
200 capped DNA as for uncapped DNA (compare FRET<sub>L→H</sub> red and blue triangles in Figure  
201 3- figure supplement 2), as are the dissociation rate constants (compare FRET<sub>H→L</sub> red  
202 and blue triangles in as well as FRET<sub>H→L</sub> red and blue circles in Figure 3- figure  
203 supplement 2). The rate constant for bimolecular binding of capped DNA decreases  
204 compared to that for uncapped DNA (compare FRET<sub>L→H</sub> red and blue circles in Figure  
205 3- figure supplement 2), which is consistent with the expected decrease in the rate of  
206 diffusion of the larger capped DNA. To assess the effect of molecular weight increase  
207 on diffusion of capped versus uncapped DNA, Sednterp (edited by S. E. Harding, 1992),  
208 a program commonly used to estimate sedimentation and diffusion properties of  
209 biomolecules, was used to estimate maximum diffusion coefficients. Including the two  
210 antibodies bound on the ends of capped DNA (320 kDa total) gives an estimated  
211 diffusion coefficient of  $4.7 \times 10^{-7} \text{ cm}^2 \text{ s}^{-1}$ , which is much lower than the estimated diffusion  
212 coefficient of the uncapped DNA ( $1.5 \times 10^{-6} \text{ cm}^2 \text{ s}^{-1}$ ). This ~3.6-fold decrease in the

213 diffusion constant for capped DNA is similar to the 6.7-fold decrease in the bimolecular  
214 rate constant for binding of capped DNA (Figure 3- figure supplement 2).

215

### 216 **Longer cTALEs have slower DNA binding and unbinding kinetics**

217 To examine how increasing the length of the cTALE array influences DNA  
218 binding, we generated Cy3-labelled constructs with 16 and 12 cTALE repeats, and  
219 measured binding to a longer Cy5-labelled DNA ( $A_{23}/T_{23}$ ). Because we did not observe  
220 FRET for these longer constructs, a fluorescence colocalization microscopy protocol  
221 was used instead (Figure 4- figure supplement 1). In this protocol, Cy3 was first imaged  
222 for ten camera frames (1017.5 msec total) to identify positions of single TALE  
223 molecules. Then a long time series of fluorescence images of Cy5 signal were collected  
224 through directly exciting Cy5 on the DNA, and time trajectories of Cy5 signal were  
225 generated from the initially identified single TALE positions.

226 Increasing the number of cTALE repeats from 8 to 12 and 16 dramatically affects  
227 DNA binding kinetics. Long movies collected over a range of DNA concentrations show  
228 short- and long-lived Cy5 signal on and off states, indicating a level of kinetic  
229 heterogeneity similar to NcTALE<sub>8</sub> (Figure 4- figure supplement 1). Single molecule  
230 traces were analyzed using a thresholding filter (see Materials and Methods and Figure  
231 4- figure supplement 1) to identify states and dwell times. Cumulative distributions were  
232 generated from dwell times at low Cy5 signal (unbound states, with lifetimes  
233 representing binding kinetics), and at high Cy5 signal (bound states, with dwell times  
234 representing unbinding kinetics). As with the eight repeat constructs, unbound

235 cumulative distributions for these longer TALE arrays are best-fit by double exponential  
236 decays, particularly at high DNA concentrations (compare the cumulative distribution at  
237 low DNA concentration, Figure 4- figure supplement 2A, to cumulative distribution at 5  
238 nM DNA, Figure 4- figure supplement 2B). Bound cumulative distributions for longer  
239 TALE arrays are best-fit by double exponential decays (Figure 4- figure supplement 2C-  
240 D). All apparent rate constants are much smaller for NcTALE<sub>16</sub> and NcTALE<sub>12</sub>  
241 (green/black circles and triangles, Figure 4A-B) compared to NcTALE<sub>8</sub>, indicating that  
242 binding and unbinding is impeded by increasing the length of the binding surface  
243 between cTALEs and their cognate DNA (Figure 4C). To address whether differences in  
244 binding kinetics are related to experimental differences between colocalization and  
245 FRET assays, alternating laser experiments were performed by switching between  
246 FRET and colocalization detection (every 5 frames) within single molecule trajectories  
247 (Figure 3- figure supplement 1). Changes in FRET and colocalization signals occurred  
248 simultaneously according to single molecule time traces, showing that differences in  
249 binding and unbinding kinetics of short and longer cTALEs are not due to differences in  
250 colocalization and FRET assays (Figure 3 - figure supplement 1).

251

### 252 **A deterministic approach to modeling cTALE-DNA binding kinetics.**

253 To determine how the kinetic changes above are partitioned into underlying  
254 kinetic steps in binding, we fitted various kinetic models to the cumulative distributions  
255 for binding and unbinding. In addition to providing information about the mechanism of  
256 binding, this approach allows us to estimate the underlying microscopic rate constants

257 and compare them for different constructs. This approach is generally applicable to  
258 studies of complex single molecule kinetics. Numerical integration was used to calculate  
259 the relative population of cTALE states as a function of time (Figures 5A-C and 5G-H),  
260 given a binding mechanism, an associated set of rate laws, and a set of initial  
261 conditions. Cumulative distributions of unbound dwell times represent the distribution of  
262 times single molecules spent in the unbound state before transitioning into the bound  
263 state, allowing us to split the kinetic scheme when fitting to single-molecule dwell times.

264 Among the various models tested, the model that is most consistent with the data  
265 has two unbound DNA-free states and two DNA-bound states. This is consistent with  
266 alternating laser experiments showing that DNA is only colocalized when cTALEs are in  
267 the high FRET state (Figure 3 - figure supplement 1). This four-state model includes a  
268 TALE isomerization step in the absence of DNA from a DNA-binding incompetent  
269 conformation (which we refer to as TALE) to DNA-binding competent conformation  
270 (which we refer to as TALE\*). The DNA-binding competent TALE\* conformer binds and  
271 unbinds DNA (called TALE\* when DNA free and TALE\*~DNA when DNA-bound).  
272 Before unbinding, a fraction of TALE\*~DNA isomerizes to a longer-lived DNA-bound  
273 state called TALE<sup>‡</sup>~DNA.

274 Based on this mechanism, the rate laws for binding are given in equations 1a -  
275 1d.

$$276 \quad \frac{d[TALE]}{dt} = -k_1[TALE] + k_{-1}[TALE^*] \quad (1a)$$

$$277 \quad \frac{d[TALE^*]}{dt} = k_1[TALE] - k_{-1}[TALE^*] - k_2[TALE^*][DNA] \quad (1b)$$

278 
$$\frac{d[\text{TALE}^* \sim \text{DNA}]}{dt} = k_2[\text{TALE}^*][\text{DNA}] \quad (1c)$$

279 
$$K_{eq, \text{DNA-free}} = \frac{k_1}{k_{-1}} \quad (1d)$$

280 Since the single-molecule dwell-time histograms of the unbound states are insensitive  
281 to the isomerization after DNA binding, the equation describing the time evolution of the  
282 long-lived bound state ( $\text{TALE}^\ddagger \sim \text{DNA}$ ) is not relevant to our analysis of unbound-state  
283 lifetimes.

284 To determine microscopic rate constants  $k_1$ ,  $k_{-1}$ , and  $k_2$ , equations 1a-1c were  
285 numerically integrated in Matlab, and the fraction of  $\text{TALE}^* \sim \text{DNA}$  as a function of time  
286 was fitted to the low-FRET cumulative distributions ( $\text{NcTALE}_8$ ; Figure 5D-E) or to the no  
287 colocalization cumulative distributions ( $\text{NcTALE}_{16}$ ; Figure 5J-K). Microscopic rate  
288 constants were adjusted to reduce sum of the squared residuals between the  
289 concentration of  $\text{TALE}^* \sim \text{DNA}$  (the direct product of binding) as a function of time and  
290 single-molecule cumulative distributions. In both cases, cumulative distributions at  
291 different bulk DNA concentrations were fitted globally. Initial fractions of TALE and  
292  $\text{TALE}^* \sim \text{DNA}$  were set to zero, and the initial fraction of  $\text{TALE}^*$  was set to one.  
293 Confidence intervals (CI) were estimated by bootstrapping (Table 1; mean and 68% CI  
294 from 2000 or 8000 bootstrap iterations).

295 Rate laws for dissociation are given in equations 2a - 2d

296 
$$\frac{d[\text{TALE}^* \sim \text{DNA}]}{dt} = -k_{-2}[\text{TALE}^* \sim \text{DNA}] - k_3[\text{TALE}^* \sim \text{DNA}] + k_{-3}[\text{TALE}^\ddagger \sim \text{DNA}] \quad (2a)$$

297 
$$\frac{d[\text{TALE}^\ddagger \sim \text{DNA}]}{dt} = k_3[\text{TALE}^* \sim \text{DNA}] - k_{-3}[\text{TALE}^\ddagger \sim \text{DNA}] \quad (2b)$$

298 
$$\frac{d[\text{TALE}^*]}{dt} = k_{-2}[\text{TALE}^* \sim \text{DNA}] \quad (2c)$$

299 
$$K_{eq, \text{DNA-bound}} = \frac{k_3}{k_{-3}} \quad (2d)$$

300 As with the system of equations above (1a-d), the equation describing the time  
301 evolution of the binding-incompetent free state (TALE) is not relevant to our analysis of  
302 bound-state lifetimes.

303 To determine microscopic rate constants  $k_{-2}$ ,  $k_{-3}$ , and  $k_3$ , equations 2a-2c were  
304 numerically integrated in Matlab, and the fraction of TALE\* as a function of time was  
305 fitted to the high-FRET cumulative distributions (NcTALE<sub>8</sub>; Figure 5F) or to the low  
306 colocalization cumulative distributions (NcTALE<sub>16</sub>; Figure 5L). Microscopic rate  
307 constants were adjusted to reduce sum of the squared residuals between the  
308 concentration of TALE\* (the direct product of dissociation) as a function of time and  
309 single-molecule cumulative distributions. In both cases, cumulative distributions at  
310 different bulk DNA concentrations were fitted globally. The initial fraction of  
311 TALE\*~DNA conformer was set at one; all other initial fractions were set to zero.  
312 Confidence intervals were estimated by bootstrapping (Table 1; mean and 68% CI from  
313 2000 iterations).

314 Fitted curves reproduce the experimental cumulative distributions for binding and  
315 unbinding (Figure 5), both for the short and long cTALE arrays, with reasonably small  
316 residuals, over a range of DNA concentrations. Generally, fitted rate constants have  
317 confidence intervals of 10% or smaller (Table 1).

318 Comparison of microscopic rate constants for 8, 12, and 16 repeats show some  
319 significant differences. The bimolecular microscopic binding rate constant,  $k_2$ , is slightly  
320 larger for 8 repeats than for 12 and 16 repeats (1.1, 0.31, and 0.39  $\text{nM}^{-1}\text{s}^{-1}$  for 8, 12, and  
321 16 repeats respectively). However, microscopic unbinding rate constant,  $k_{-2}$ , is higher  
322 for 8 repeat cTALEs (0.66  $\text{s}^{-1}$  for NcTALE<sub>8</sub> versus 0.13  $\text{s}^{-1}$  for NcTALE<sub>12</sub> and 0.299  $\text{s}^{-1}$  for  
323 NcTALE<sub>16</sub>). Also, bound state isomerization (interconversion between TALE\*~DNA and  
324 TALE<sup>‡</sup>~DNA) is 5-10 times slower for 16 and 12 repeat cTALEs than 8 repeat cTALEs.  
325 The value of  $K_{\text{eq, DNA-free}}$ , which is a measure of the equilibrium proportion of the  
326 unbound TALE that is DNA-binding competent (TALE\*) to that which is binding-  
327 incompetent (TALE), is larger for cTALEs with 8 repeats ( $K_{\text{eq, DNA-free}} = 1.32$ ) than for  
328 cTALEs with 12 and 16 repeats ( $K_{\text{eq, DNA-free}} = 0.11$  and  $K_{\text{eq, DNA-free}} = 0.61$ , respectively).

329

## 330 Discussion

331 By measuring DNA-binding kinetics of cTALE arrays that form 0.7, 1, and 1.4  
332 superhelical turns, we probe the functional relevance of locally unfolded TALE states.  
333 We describe a novel method to glean mechanistic details from complex single molecule  
334 kinetics. In our simplified cTALE system, we find conformational heterogeneity in both  
335 DNA free and DNA-bound states. We find that association is slowed in arrays  
336 containing one full turn of repeats or more. Because most natural and designed TALEs  
337 contain more than a full turn of repeats, this finding has important implications for design  
338 of high affinity TALE endonucleases (TALEN) molecules, suggesting that placement of  
339 destabilized repeats at specific positions may increase activity.



340

341 **cTALEs containing NS RVD bind DNA with high affinity**

342 NS is an uncommon RVD in natural TALEs. Previous reports suggest that NS is  
343 fairly nonspecific, but may bind with higher affinity than other common RVDs (NG, NI,  
344 NN, and HD)(Miller et al., 2015). Our fitted rate constants can be used to calculate the  
345 apparent  $K_d$  ( $K_{app}$ ) calculated from using equation as follows:

$$\begin{aligned} K_{app} &= \frac{[TALE - DNA + TALE^* - DNA]}{[DNA][TALE + TALE^*]} \\ 346 \quad &= \frac{K_{eq,DNA-free}K_2 + K_{eq,DNA-free}K_2K_{eq,DNA-bound}}{1 + K_{eq,DNA-free}} \quad (3) \\ &= \frac{\frac{k_1}{k_{-1}} \times \frac{k_2}{k_{-2}} (1 + \frac{k_3}{k_{-3}})}{1 + \frac{k_1}{k_{-1}}} \end{aligned}$$

347 where  $K_2 = k_2/k_{-2}$ .

348

349 Using fitted rate constants from Table 1 in the final equality in equation 3 gives values  
350 for  $K_{app}$  of 2.5 nM for the 8 repeat cTALE array, 0.5 nM for the 12 repeat cTALE array,  
351 and 1.0 nM for the 16 repeat cTALE array. Increasing the number of repeats has a  
352 modest affect on the apparent  $K_d$  due to the increased population of binding  
353 incompetent DNA free TALE in the 12, and 16 repeat arrays. This affinity change is  
354 small compared to a previous report studying length dependence on affinity of designed  
355 TALEs (dTALes) showing the  $K_d$  of a dTALE decreased by a factor of two with the  
356 addition of only 1.5 repeats (Rinaldi et al., 2017).

357 TALEs are believed to read out sequence information from one strand (Boch et  
358 al., 2009). Due to the asymmetry of our DNA sequences (poly-dA base-paired with  
359 poly-dT), in principle, the FRET efficiency contains information on the binding  
360 orientation (and thus strand preference). However, based on the crystal structure of the  
361 DNA-bound state of TAL-effector PthXo1 (Mak et al., 2012), we estimate that the  
362 distance between the donor site of NcTALE<sub>8</sub> (repeat 1) to the 5' acceptor site on the  
363 DNA (Cy5-A<sub>15</sub>/T<sub>15</sub>) should be similar for both the dA-sense or dT-sense orientations  
364 (Figure 4- figure supplement 3A). Thus, the FRET data does not discriminate between  
365 the two modes of binding for the eight-repeat construct. However, for the 16 repeat NS  
366 RVD cTALE arrays, the PthXo1 model suggests very different distances (25 Å versus  
367 73 Å for the dT-sense or dA-sense respectively, Figure 4- figure supplement 3B)  
368 between the donor site (TALE repeat 14) and the acceptor site (5' Cy5-A<sub>23</sub>/T<sub>23</sub>). To  
369 restrict the number of binding positions available to longer cTALE arrays, the 23 base  
370 pair DNA used for NcTALE<sub>16</sub> measurements (as well as DNA depicted in Figure 4-  
371 figure supplement 3B) has the same number of additional base pairs as repeats (8  
372 additional repeats and 8 additional base pairs) compared to the 15 base pair DNA used  
373 for NcTALE<sub>8</sub> measurements (as well as DNA depicted in Figure 4- figure supplement  
374 3A). While we limited the number of available binding positions, it may be possible for  
375 cTALEs to slide along DNA. However, taking into account the four repeat N-terminal  
376 capping domain, there are only three available base pairs in the bound complex. Thus  
377 we don't expect the distance measurements to change by more than 10Å (~3 base  
378 pairs) if sliding occurs. The observation that there is colocalization but no measurable

379 FRET when NcTALE<sub>16</sub> is bound to DNA suggests that cTALEs containing the NS RVD  
380 prefer adenine (the dA-sense mode) compared with thymine bases, consistent with  
381 previous reports (Boch et al., 2009).

382

383 **Conformational heterogeneity in the unbound state may be caused by local**  
384 **unfolding**

385 The cumulative distributions of dwell-times in Figure 3 provide clear evidence for  
386 conformational heterogeneity in both the free and DNA-bound cTALEs. Although the  
387 deterministic modeling supports such heterogeneity, puts it in the framework of a  
388 molecular model, and provides a means to determine the microscopic rate and  
389 equilibrium constants, such analysis provides little information about the structural  
390 nature of TALE conformational heterogeneity.

391 Figure 6 shows a model of cTALE conformational change consistent with DNA  
392 binding kinetics. In this model there are four TALE states. DNA-free cTALEs comprise  
393 both incompetent and binding competent states. DNA-bound cTALES comprise  
394 encounter and locked complexes with DNA. For 8 repeat cTALE arrays, the DNA-  
395 binding competent state is more highly populated than the DNA-binding incompetent  
396 state. In this reaction scheme, the DNA-binding incompetent state can be regarded as  
397 an off-pathway conformation that inhibits DNA binding (Figure 6A).

398 Because the 8 repeat cTALE array does not form multiple turns of a superhelix,  
399 unfolding to bind DNA is not required. In the model in Figure 6, the binding competent  
400 state is the fully folded conformation, whereas the binding incompetent state includes

401 partly folded conformations. Consistent with this interpretation, increasing populations of  
402 partly folded states through addition of 1M urea and through entropy enhancing  
403 mutations decreases apparent binding rates of 8 repeat cTALEs (Figure 6- figure  
404 supplement 1). This is also consistent with a partly folded DNA-binding incompetent  
405 state in shorter cTALE arrays.

406 For 12 and 16 repeat cTALE arrays, the DNA-binding incompetent state is more  
407 highly populated than the DNA-binding competent state. In the model in Figure 6, the  
408 DNA-binding competent state is a high-energy conformation required for DNA binding  
409 (Figure 6B-C). Because 12 and 16 repeat cTALEs are expected to form 1 and 1.4 turns  
410 (excluding the N-terminal domain), we hypothesize that the binding competent state  
411 includes some partly folded states that allow access to DNA. Not all partly folded states  
412 open the array to access DNA; therefore, the binding incompetent state includes some  
413 nonproductive partly folded states in addition to the fully folded state.

414 In arrays containing 12 or more cTALEs, the binding competent and binding  
415 incompetent states likely include mixtures of many specific partly folded states. Because  
416 the types of partly folded states are unknown, connecting equilibria between binding  
417 competent and binding incompetent states to calculated partly folded equilibria (using  
418 folding free energies similar to Figure 1) is challenging. Future work towards  
419 understanding the structural characteristics of the binding competent state in TALE  
420 arrays of one or more turns would inform which partly folded states to include in the  
421 calculation, making this comparison meaningful. A better structural understanding of the  
422 DNA binding competent state will also allow an opportunity for precise placement of

423 destabilized repeats in designed TALEN arrays which may enable more precise gene  
424 editing methodologies in both clinical and basic research applications.

425

### 426 **TALE functional instability presents a new mode of transcription factor binding**

427       Here we demonstrate kinetic heterogeneity in DNA-bound and unbound TALE  
428 arrays, and we subsequently link the observed heterogeneity to partial unfolding of  
429 TALE arrays. We propose a model where binding requires partial unfolding of TALE  
430 arrays longer than one superhelical turn providing a functional role for previously  
431 observed moderate stability of TALE arrays. The functional instability described is  
432 particularly surprising given the small population of partly folded states which we expect  
433 to be DNA binding competent (partly folded states similar to internally unfolded and  
434 interfacially fractured states depicted in Figure 1A). Discovery of a functional role for the  
435 observed conformational heterogeneity is even more surprising, given the sequence  
436 identity of each of our repeats. Sequence heterogeneity in naturally occurring TALE  
437 arrays may further enable access to partly folded binding-competent states.

438       While it is well understood that many transcription factors sometimes undergo  
439 local folding transition upon DNA binding (Spolar and Record, 1994; Tsafou et al.,  
440 2018), the findings here indicate that for TALE arrays, the major conformer is fully  
441 folded, and must undergo a local unfolding transition in order to bind DNA. Taken  
442 together, these findings suggest a new mode of transcription factor binding and provide  
443 compelling evidence for functional instability in TALE arrays.

444

## 445 **Conformational heterogeneity in the bound state**

446 Previous reports show that TALEs have multiple diffusional modes when  
447 searching nonspecific DNA (Cuculis et al., 2015). Our work suggests that cTALEs have  
448 multiple binding modes (encounter and locked states in Figure 6) indicating cTALEs  
449 undergo a conformational change also when bound to specific DNA sequences. Table 1  
450 shows that microscopic rate constants for transition into and out of longer lived locked  
451 bound states become much slower in 12 and 16 repeat cTALEs compared with 8 repeat  
452 cTALEs ( $k_{-3}$  and  $k_3$ ). These rate constants decrease much more than the microscopic  
453 unbinding rate constant (the  $k_{-2}$  values are  $0.66 \text{ s}^{-1}$ ,  $0.13 \text{ s}^{-1}$ , and  $0.299 \text{ s}^{-1}$  for NcTALE<sub>8</sub>,  
454 NcTALE<sub>12</sub>, and NcTALE<sub>16</sub> respectively) suggesting a large conformational change that  
455 depends on the number of repeats. Although the model does not provide information on  
456 structure of this conformational change, it is possible this conformational change  
457 involves a slinky motion to decrease helical rise. Consistent with this hypothesis, crystal  
458 structures of TALEs in the free and DNA-bound state show 11.5 repeats per turn in both  
459 states, but the helical rise decreases upon binding (Deng et al., 2012). Another  
460 possibility involves specific interaction with RVDs and bases in the major groove of  
461 DNA. Crystal structures show little deformation of DNA structure, so bending of DNA  
462 seems unlikely. While we can only hypothesize about the structural nature of the  
463 conformational changes, deterministic simulations show that cTALEs bind DNA through  
464 short encounters which occasionally become long-lived locked conformations (Figure  
465 6). Taken together, these findings indicate that functional instability plays a crucial role

466 in cTALE DNA binding, and demonstrate the importance of conformational dynamics in  
467 complex assembly.

468

## 469 **Materials and Methods**

### 470 **Cloning, expression, purification, and labeling**

471 Consensus TALE repeat constructs were cloned with C-terminal His<sub>6</sub> tags via an  
472 in-house version of Golden Gate cloning (Cermak et al., 2011). TALE constructs were  
473 grown in BL21(T1R) cells at 37°C to an OD of 0.6-0.8 and induced with 1 mM IPTG.  
474 Following cell pelleting and lysis, proteins were purified by resuspending the insoluble  
475 material in 6M urea, 300 mM NaCl, 0.5 mM TCEP, and 10 mM NaPO<sub>4</sub> pH 7.4.

476 Constructs were loaded onto a Ni-NTA column. Protein was eluted using 250 mM  
477 imidazole and refolded during buffer exchange into 300 mM NaCl, 30% glycerol, 0.5  
478 mM TCEP, and 10 mM NaPO<sub>4</sub> pH 7.4.

479 Labelling of cTALE arrays followed a previously reported protocol (Rasnik et al.,  
480 2004). NcTALE<sub>8</sub> and NcTALE<sub>12</sub> were labeled at residue R30C in the first repeat, while  
481 NcTALE<sub>16</sub> was labeled at residue R30C in the fourteenth repeat. 1 mg protein was  
482 loaded onto 500 uL NiNTA spin column. The column as washed with 10 column  
483 volumes of 300 mM NaCl, 0.5 mM TCEP, and 10 mM NaPO<sub>4</sub> pH 7.4. Tenfold molar  
484 excess Cy3 maleimide dye was resuspended in 10 µL DMSO and added to column.  
485 The column was rocked at room temperature for 30 minutes, then at 4°C overnight.  
486 Cy3-labeled protein was eluted with 250 mM imidazole, 300 mM NaCl, 30% glycerol,

487 0.5 mM TCEP, and 10 mM NaPO<sub>4</sub> pH 7.4. Protein was stored in 300 mM NaCl, 30%  
488 glycerol, 0.5 mM TCEP, and 10 mM NaPO<sub>4</sub> pH 7.4 at -80°C.

### 489 **Oligonucleotides**

490 Sequences used for binding studies were 5'-Cy5-A<sub>15</sub>-3' and 5' T<sub>15</sub>-3' duplex  
491 (Cy5-A<sub>15</sub>/T<sub>15</sub>) for 8 repeat binding studies, and 5'-Cy5-A<sub>23</sub>-3' and 5' T<sub>23</sub>-3' duplex (Cy5-  
492 A<sub>23</sub>/T<sub>23</sub>) for 12 and 16 repeat binding studies. DNA was annealed at 5 μM concentration  
493 with 1.2-fold molar excess unlabeled strand in 10 mM Tris pH 7.0, 30 mM NaCl.

### 494 **Single-molecule detection and data analysis**

495 Biotinylated quartz slides and glass coverslips were prepared as previously  
496 described (Rasnik et al., 2004). Cy3-labeled cTALEs were immobilized on biotinylated  
497 slides taking advantage of neutravidin interaction with biotinylated α-penta•His antibody  
498 which binds the His<sub>6</sub> cTALE tag. Slides were pretreated with blocking buffer (5 μL yeast  
499 tRNA, 5 μL BSA, 40 μL T50) before addition of 250 pM labeled cTALE. Cy5-labeled  
500 duplex DNA was mixed with imaging buffer (20 mM Tris pH 8.0, 200 mM KCl, 0.5 mg  
501 mL<sup>-1</sup> BSA, 1 mg mL<sup>-1</sup> glucose oxidase, 0.004 mg mL<sup>-1</sup> catalase, 0.8% dextrose and  
502 saturated Trolox ~1mg mL<sup>-1</sup>) and molecules were imaged using total internal reflection  
503 fluorescence microscopy. The time resolution was 50 msec for NcTALE<sub>8</sub> and 100 msec  
504 for NcTALE<sub>16</sub> and NcTALE<sub>12</sub>. Collection and analysis was performed as previously  
505 described (Roy et al., 2008).

### 506 **FRET histograms**

507 A minimum of 20 short movies were collected, and the first 5 frames (50 msec  
508 exposure time) were used to generate smFRET histograms. FRET was calculated as



509  $I_A/(I_A+I_D)$  where  $I_A$  and  $I_D$  are donor-leakage and background corrected fluorescence  
510 emission of acceptor (Cy5) and donor (Cy3) fluorophores. In competition experiments,  
511 unlabeled DNA with the same sequence as labeled DNA was mixed at indicated  
512 concentrations with labeled DNA prior to imaging.

### 513 **Dwell time analysis**

514 Long movies were collected with 50 msec exposure time for NcTAL<sub>E8</sub> and 100  
515 msec exposure time for NcTAL<sub>E16</sub> and NcTAL<sub>E16</sub>. At least 20 representative traces at  
516 each DNA concentration were selected and dwell times were determined by fitting as  
517 previously described using HaMMY (McKinney et al., 2006) for FRET in NcTAL<sub>E8</sub>. Dwell  
518 times in NcTAL<sub>E12</sub> and NcTAL<sub>E16</sub> colocalization experiments are determined by using a  
519 thresholding procedure for Cy5 excitation (Figure 4- figure supplement 1). The algorithm  
520 used to identify low and high emission states here is slightly different than previously  
521 described thresholding algorithms (Blanco and Walter, 2010). To reduce the number of  
522 incorrectly identified transitions arising from increased background and noise at higher  
523 Cy5-labeled DNA concentrations, a thresholding algorithm with two limits was  
524 implemented (see Figure 4- figure supplement 1). All FRET and colocalization data are  
525 well described by models with two distinct states (0.0 FRET and ~0.45 FRET as well as  
526 low colocalization and high colocalization). Dwell times of the same state (low versus  
527 high FRET or low versus high colocalization) for all traces at a given DNA concentration  
528 are compiled, and cumulative distribution is generated with spacing equal to imaging  
529 exposure time.

530 To determine apparent rate constants using model-independent analysis,  
531 cumulative distributions were fitted with single and double exponential decays (Figure 3  
532 and 4). Observed rates from exponential decay fits were plotted as a function of DNA  
533 concentration. Apparent rate constants were calculated as slope of DNA concentration-  
534 dependent observed rates or average of DNA concentration-independent observed  
535 rates.

### 536 **Deterministic modeling**

537 Equations 1a-1c and 2a-2c were numerically integrated using the ODE15s and ODE45  
538 solver in MATLAB. Microscopic rate constants were adjusted to minimize the sum of  
539 squared residuals between ODE-determined concentration of bound or free TALE and  
540 single molecule cumulative distributions using lsqnonlin in MATLAB. 68% confidence  
541 intervals were estimated by performing 2000 or 8000 bootstrap iterations in which  
542 residuals from the best fit of the model to the data were randomly re-sampled (with  
543 replacement) and re-fitted. All scripts and source data required to run this MATLAB  
544 program called **D**eterministic **M**odeling for **A**nalysis of complex **S**ingle molecule **K**inetics  
545 (DeMASK) are publicly available on GitHub at <https://github.com/kgeigers/DeMASK>.

546

### 547 **Acknowledgements**

548 The authors thank members of the Barrick and Ha lab for their input on this work.  
549 The authors acknowledge the support of the Center for Molecular Biophysics at Johns  
550 Hopkins and Dr. Katherine Tripp for instrumental and technical support. Support to

551 KGS was provided by NIH training grant T32-GM008403. Support for this project was  
552 provided by NIH grant 1R01-GM068462 to DB and GM112659 to TH.  
553

## 554 **References**

- 555 Aksel, T., Majumdar, A., Barrick, D., 2011. The contribution of entropy, enthalpy, and  
556 hydrophobic desolvation to cooperativity in repeat-protein folding. *Struct. Lond.*  
557 *Engl.* 1993 19, 349–360. <https://doi.org/10.1016/j.str.2010.12.018>
- 558 Blanco, M., Walter, N., 2010. Analysis of Complex Single Molecule FRET Time  
559 Trajectories. *Methods Enzymol.* 472, 153–178. [https://doi.org/10.1016/S0076-6879\(10\)72011-5](https://doi.org/10.1016/S0076-6879(10)72011-5)
- 561 Boch, J., Bonas, U., 2010. Xanthomonas AvrBs3 family-type III effectors: discovery and  
562 function. *Annu. Rev. Phytopathol.* 48, 419–436. <https://doi.org/10.1146/annurev-phyto-080508-081936>
- 564 Boch, J., Scholze, H., Schornack, S., Landgraf, A., Hahn, S., Kay, S., Lahaye, T.,  
565 Nickstadt, A., Bonas, U., 2009. Breaking the code of DNA binding specificity of  
566 TAL-type III effectors. *Science* 326, 1509–1512.  
567 <https://doi.org/10.1126/science.1178811>
- 568 Cermak, T., Doyle, E.L., Christian, M., Wang, L., Zhang, Y., Schmidt, C., Baller, J.A.,  
569 Somia, N.V., Bogdanove, A.J., Voytas, D.F., 2011. Efficient design and assembly  
570 of custom TALEN and other TAL effector-based constructs for DNA targeting.  
571 *Nucleic Acids Res.* 39, e82. <https://doi.org/10.1093/nar/gkr218>
- 572 Christian, M., Cermak, T., Doyle, E.L., Schmidt, C., Zhang, F., Hummel, A., Bogdanove,  
573 A.J., Voytas, D.F., 2010. Targeting DNA Double-Strand Breaks with TAL Effector  
574 Nucleases. *Genetics* 186, 757–761. <https://doi.org/10.1534/genetics.110.120717>
- 575 Cong, L., Zhou, R., Kuo, Y.-C., Cunniff, M., Zhang, F., 2012. Comprehensive  
576 interrogation of natural TALE DNA-binding modules and transcriptional repressor  
577 domains. *Nat. Commun.* 3, 968. <https://doi.org/10.1038/ncomms1962>
- 578 Cuculis, L., Abil, Z., Zhao, H., Schroeder, C.M., 2015. Direct observation of TALE  
579 protein dynamics reveals a two-state search mechanism. *Nat. Commun.* 6, 7277.  
580 <https://doi.org/10.1038/ncomms8277>
- 581 Deng, D., Yan, C., Pan, X., Mahfouz, M., Wang, J., Zhu, J.-K., Shi, Y., Yan, N., 2012.  
582 Structural basis for sequence-specific recognition of DNA by TAL effectors.  
583 *Science* 335, 720–723. <https://doi.org/10.1126/science.1215670>
- 584 edited by S. E. Harding, A.J.R., 1992. Analytical ultracentrifugation in biochemistry and  
585 polymer science. Royal Society of Chemistry, Cambridge [England].
- 586 Gao, H., Wu, X., Chai, J., Han, Z., 2012. Crystal structure of a TALE protein reveals an  
587 extended N-terminal DNA binding region. *Cell Res.* 22, 1716–1720.  
588 <https://doi.org/10.1038/cr.2012.156>
- 589 Geiger-Schuller, K., Barrick, D., 2016. Broken TALEs: Transcription Activator-like  
590 Effectors Populate Partly Folded States. *Biophys. J.* 111, 2395–2403.  
591 <https://doi.org/10.1016/j.bpj.2016.10.013>
- 592 Geiger-Schuller, K., Sforza, K., Yuhas, M., Parmeggiani, F., Baker, D., Barrick, D.,  
593 2018. Extreme stability in de novo-designed repeat arrays is determined by  
594 unusually stable short-range interactions. *Proc. Natl. Acad. Sci.* 201800283.  
595 <https://doi.org/10.1073/pnas.1800283115>

- 596 Geissler, R., Scholze, H., Hahn, S., Streubel, J., Bonas, U., Behrens, S.-E., Boch, J.,  
597 2011. Transcriptional activators of human genes with programmable DNA-  
598 specificity. *PloS One* 6, e19509. <https://doi.org/10.1371/journal.pone.0019509>
- 599 Kay, S., Hahn, S., Marois, E., Hause, G., Bonas, U., 2007. A bacterial effector acts as a  
600 plant transcription factor and induces a cell size regulator. *Science* 318, 648–  
601 651. <https://doi.org/10.1126/science.1144956>
- 602 Li, T., Huang, S., Jiang, W.Z., Wright, D., Spalding, M.H., Weeks, D.P., Yang, B., 2011.  
603 TAL nucleases (TALNs): hybrid proteins composed of TAL effectors and FokI  
604 DNA-cleavage domain. *Nucleic Acids Res.* 39, 359–372.  
605 <https://doi.org/10.1093/nar/gkq704>
- 606 Li, Y., Moore, R., Guinn, M., Bleris, L., 2012. Transcription activator-like effector hybrids  
607 for conditional control and rewiring of chromosomal transgene expression. *Sci.*  
608 *Rep.* 2, 897. <https://doi.org/10.1038/srep00897>
- 609 Ma, H., Reyes-Gutierrez, P., Pederson, T., 2013. Visualization of repetitive DNA  
610 sequences in human chromosomes with transcription activator-like effectors.  
611 *Proc. Natl. Acad. Sci. U. S. A.* 110, 21048–21053.  
612 <https://doi.org/10.1073/pnas.1319097110>
- 613 Maeder, M.L., Angstman, J.F., Richardson, M.E., Linder, S.J., Cascio, V.M., Tsai, S.Q.,  
614 Ho, Q.H., Sander, J.D., Reyon, D., Bernstein, B.E., Costello, J.F., Wilkinson,  
615 M.F., Joung, J.K., 2013. Targeted DNA demethylation and activation of  
616 endogenous genes using programmable TALE-TET1 fusion proteins. *Nat.*  
617 *Biotechnol.* 31, 1137–1142. <https://doi.org/10.1038/nbt.2726>
- 618 Mahfouz, M.M., Li, L., Piatek, M., Fang, X., Mansour, H., Bangarusamy, D.K., Zhu, J.-  
619 K., 2012. Targeted transcriptional repression using a chimeric TALE-SRDX  
620 repressor protein. *Plant Mol. Biol.* 78, 311–321. [https://doi.org/10.1007/s11103-](https://doi.org/10.1007/s11103-011-9866-x)  
621 [011-9866-x](https://doi.org/10.1007/s11103-011-9866-x)
- 622 Mak, A.N.-S., Bradley, P., Cernadas, R.A., Bogdanove, A.J., Stoddard, B.L., 2012. The  
623 crystal structure of TAL effector PthXo1 bound to its DNA target. *Science* 335,  
624 716–719. <https://doi.org/10.1126/science.1216211>
- 625 McKinney, S.A., Joo, C., Ha, T., 2006. Analysis of single-molecule FRET trajectories  
626 using hidden Markov modeling. *Biophys. J.* 91, 1941–1951.  
627 <https://doi.org/10.1529/biophysj.106.082487>
- 628 Miller, J.C., Zhang, L., Xia, D.F., Campo, J.J., Ankoudinova, I.V., Guschin, D.Y.,  
629 Babiarz, J.E., Meng, X., Hinkley, S.J., Lam, S.C., Paschon, D.E., Vincent, A.I.,  
630 Dulay, G.P., Barlow, K.A., Shivak, D.A., Leung, E., Kim, J.D., Amora, R., Urnov,  
631 F.D., Gregory, P.D., Rebar, E.J., 2015. Improved specificity of TALE-based  
632 genome editing using an expanded RVD repertoire. *Nat. Methods* 12, 465–471.  
633 <https://doi.org/10.1038/nmeth.3330>
- 634 Miyanari, Y., Ziegler-Birling, C., Torres-Padilla, M.-E., 2013. Live visualization of  
635 chromatin dynamics with fluorescent TALEs. *Nat. Struct. Mol. Biol.* 20, 1321–  
636 1324. <https://doi.org/10.1038/nsmb.2680>
- 637 Moscou, M.J., Bogdanove, A.J., 2009. A simple cipher governs DNA recognition by TAL  
638 effectors. *Science* 326, 1501. <https://doi.org/10.1126/science.1178817>

- 639 Newville, M., Stensitzki, T., Allen, D.B., Ingargiola, A., 2014. LMFIT: Non-Linear Least-  
640 Square Minimization and Curve-Fitting for Python¶. Zenodo.  
641 <https://doi.org/10.5281/zenodo.11813>
- 642 O'Donnell, M., Kuriyan, J., 2006. Clamp loaders and replication initiation. *Curr. Opin.*  
643 *Struct. Biol.* 16, 35–41. <https://doi.org/10.1016/j.sbi.2005.12.004>
- 644 Rasnik, I., Myong, S., Cheng, W., Lohman, T.M., Ha, T., 2004. DNA-binding Orientation  
645 and Domain Conformation of the E.coli Rep Helicase Monomer Bound to a  
646 Partial Duplex Junction: Single-molecule Studies of Fluorescently Labeled  
647 Enzymes. *J. Mol. Biol.* 336, 395–408. <https://doi.org/10.1016/j.jmb.2003.12.031>
- 648 Rinaldi, F.C., Doyle, L.A., Stoddard, B.L., Bogdanove, A.J., 2017. The effect of  
649 increasing numbers of repeats on TAL effector DNA binding specificity. *Nucleic*  
650 *Acids Res.* <https://doi.org/10.1093/nar/gkx342>
- 651 Römer, P., Hahn, S., Jordan, T., Strauss, T., Bonas, U., Lahaye, T., 2007. Plant  
652 pathogen recognition mediated by promoter activation of the pepper Bs3  
653 resistance gene. *Science* 318, 645–648. <https://doi.org/10.1126/science.1144958>
- 654 Roy, R., Hohng, S., Ha, T., 2008. A practical guide to single-molecule FRET. *Nat.*  
655 *Methods* 5, 507–516. <https://doi.org/10.1038/nmeth.1208>
- 656 Spolar, R.S., Record, M.T., 1994. Coupling of local folding to site-specific binding of  
657 proteins to DNA. *Science* 263, 777–784.
- 658 Tsafou, K., Tiwari, P.B., Forman-Kay, J.D., Metallo, S.J., Toretsky, J.A., 2018. Targeting  
659 Intrinsically Disordered Transcription Factors: Changing the Paradigm. *J. Mol.*  
660 *Biol., Intrinsically Disordered Proteins* 430, 2321–2341.  
661 <https://doi.org/10.1016/j.jmb.2018.04.008>
- 662 Zhang, F., Cong, L., Lodato, S., Kosuri, S., Church, G.M., Arlotta, P., 2011. Efficient  
663 construction of sequence-specific TAL effectors for modulating mammalian  
664 transcription. *Nat. Biotechnol.* 29, 149–153. <https://doi.org/10.1038/nbt.1775>  
665
- 666

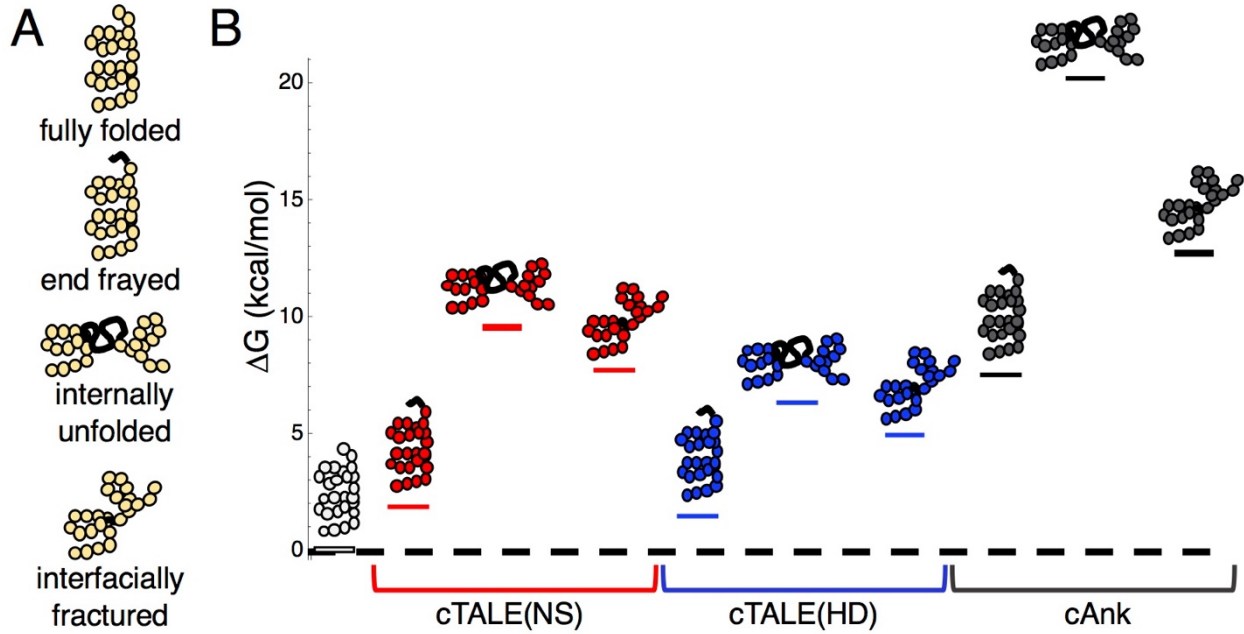

667

668 **Figure 1. cTALEs populate partly folded states.** (A) Cartoon of different partly folded

669 TALE conformational states. End-frayed states have one (or more) terminal repeats

670 unfolded. Internally unfolded states have a central repeat unfolded. Interfacially

671 fractured states have a disrupted interface between adjacent repeats. (B) Free energies

672 of partly folded states, calculated from previously published measurements and analysis

673 (Geiger-Schuller and Barrick, 2016), relative to the fully folded state, for consensus

674 TALE repeats with the NS repeat-variable diresidue sequence (cTALE(NS), red),

675 consensus TALE repeats with the HD repeat-variable diresidue sequence (cTALE(HD),

676 blue), and consensus ankyrin repeats (cAnk, black).

677

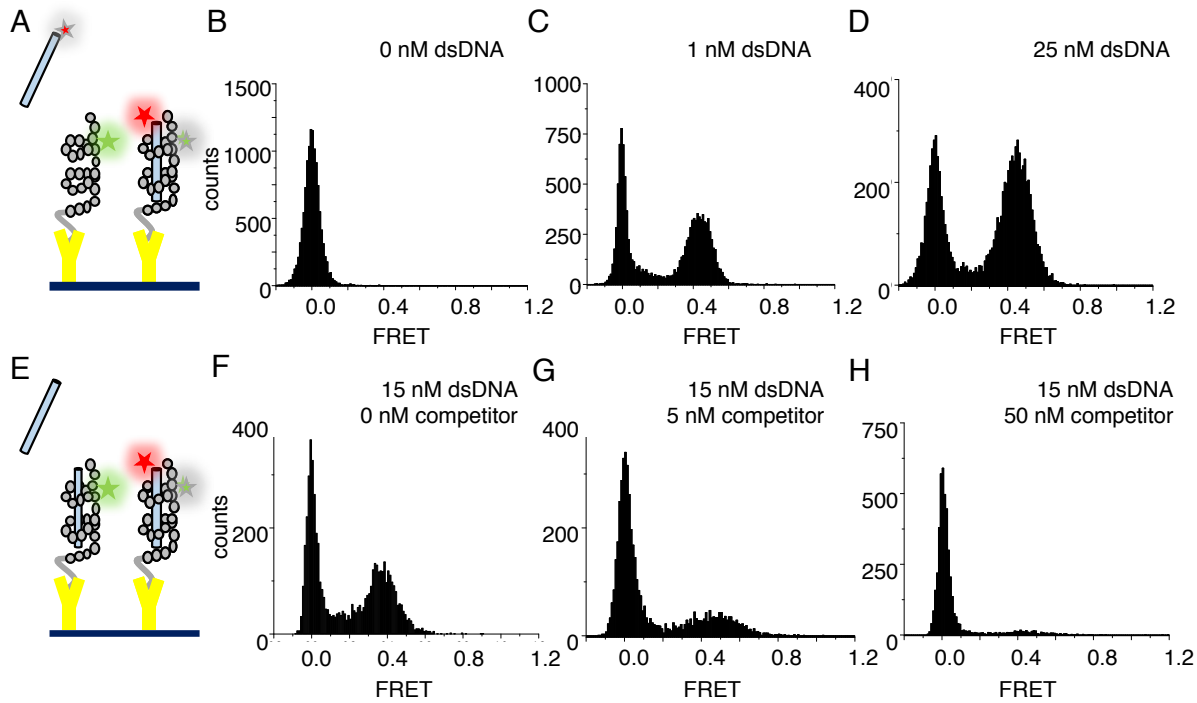

678

679 **Figure 2. cTALEs bind dsDNA reversibly.** (A) Schematic of single-molecule FRET  
680 assay, with donor-labelled cTALE attached to a surface, and acceptor-labelled DNA free  
681 in solution. (B-D) Single molecule FRET histograms show the appearance of a peak at  
682 a FRET efficiency of 0.45 with increasing labelled DNA, consistent with a DNA-bound  
683 cTALE. (E) Schematic of single-molecule FRET competition assay, with donor-labelled  
684 cTALE attached to a surface, and acceptor-labelled DNA as well as competitor  
685 unlabeled DNA free in solution. (F-H) Single molecule FRET histograms show the  
686 disappearance of the peak at 0.45 FRET efficiency with increasing unlabeled competitor  
687 DNA. Conditions: 20 mM Tris pH 8.0, 200 mM KCl.



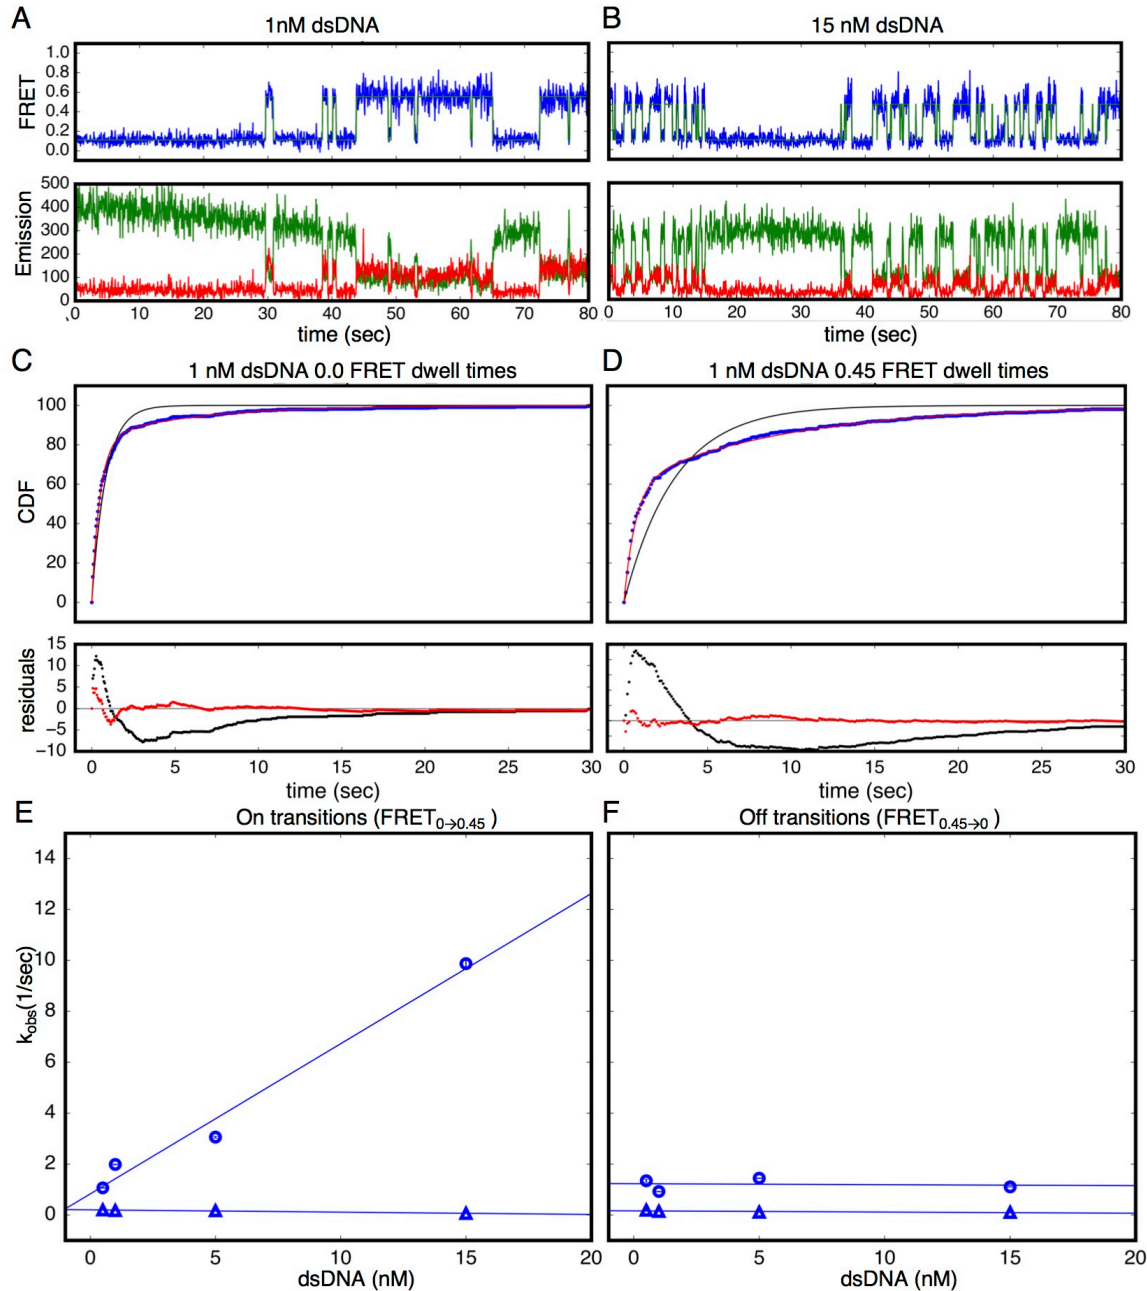

688

689 **Figure 3. Single Molecule (SM) kinetics show multiple phases in binding and**  
690 **unbinding kinetics.** (A-B) Long time trajectories showing transitions between low- and  
691 high-FRET states (efficiencies of 0 and 0.45). The top panel shows calculated FRET  
692 efficiency in blue and two-state Hidden Markov Model fit in green (McKinney et al.,  
693 2006). The bottom panels show Cy3 and Cy5 fluorescence emission in green and red

694 respectively. At low DNA concentration (A), the low FRET state predominates. As DNA  
695 concentration is increased (B), more time is spent in the high FRET state, because the  
696 dwell times in the low FRET state are shorter. At low DNA concentrations, there  
697 appears to be long- and short-lived high-FRET states. Likewise, at near-saturating DNA  
698 concentrations, there appear to be long and short-lived low FRET states. (C, D)  
699 Cumulative distributions of low- and high-FRET dwell times (blue circles). Fits to single-  
700 exponentials (black) show large nonrandom residuals (lower panels), consistent with the  
701 heterogeneity noted in (A) and (B). Double-exponentials (red) give smaller, more  
702 uniform residuals. (E) Apparent association rate constants as a function of DNA  
703 concentration. The apparent rate constants for the fast phase depend on DNA  
704 concentration (blue circles), indicating a bimolecular step binding event. The apparent  
705 rate constants for the slow phase do not depend on DNA-concentration (blue triangles),  
706 suggesting an isomerization event. (F) Apparent dissociation rate constants as a  
707 function of DNA concentration (phase 1 shown in blue circles, and phase 2 shown in  
708 blue triangles). Neither phase shows a DNA concentration dependence, indicating a  
709 dissociation and/or isomerization events. 67.4% confidence intervals are estimated  
710 using the `conf_interval` function of `lmfit` by performing F-tests (Newville et al., 2014).  
711 Conditions: 20 mM Tris pH 8.0, 200 mM KCl.

712 **Figure supplement 1.** Alternating laser experiments show agreement between cTALE<sub>8</sub>  
713 FRET and colocalization kinetics.

714 **Figure supplement 2.** cTALEs do not slide onto ends of short dsDNA.

715 **Source data 1.** List of values used to construct long time trajectories.

716 **Source data 2.** List of values used to construct CDFs.

717

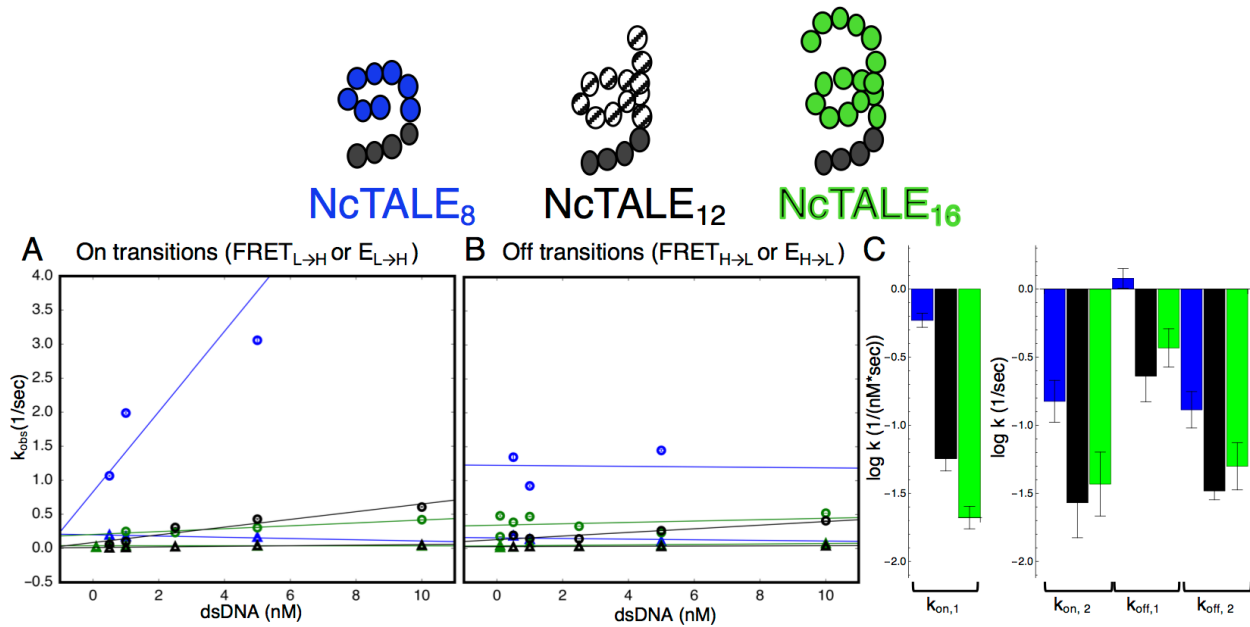

718

719 **Figure 4. A 16-repeat TALE protein binds and unbinds DNA more slowly than an**

720 **eight repeat protein.** (A) Apparent association rate constants as a function of DNA

721 concentration for an 8 repeat cTALE (blue), a 12 repeat cTALE (black), and a 16 repeat

722 cTALE (green). 8 repeat TALE kinetics are measured by FRET (FRET<sub>L→H</sub>) while 12 and

723 16 repeat TALE kinetics are measured by colocalization (E<sub>L→H</sub>). The apparent rate

724 constants for the fast phase of binding are DNA concentration dependent (blue, black,

725 and green circles), indicating a bimolecular binding event. The DNA concentration-

726 dependence is greatest (larger slope) for the 8 repeat cTALE. The apparent rate

727 constants for the slow phase do not depend on DNA-concentration (blue, black, and

728 green triangles), suggesting an isomerization event. (B) Apparent dissociation rate

729 constants as a function of DNA concentration (phase 1 shown in circles, and phase 2

730 shown in triangles). Neither phase shows a DNA concentration dependence, indicating

731 a dissociation and/or isomerization events. Rate constants for all phases are slower for

732 the 12-repeat construct (black) and 16-repeat construct (green) than for the 8-repeat  
733 construct (blue), particularly for the bimolecular binding step. (C)  $\text{Log}_{10}$  of rate constants  
734 for 8 (blue), 12 (black), and 16 (green) repeat cTALEs. Units of the bimolecular binding  
735 rate constant are  $\text{nM}^{-1}\text{s}^{-1}$ , other unimolecular rate constants have units  $\text{s}^{-1}$ . 67.4%  
736 confidence intervals are estimated using the `conf_interval` function of `lmfit` by performing  
737 F-tests (Newville et al., 2014). Conditions: 20 mM Tris pH 8.0, 200 mM KCl.

738 **Figure supplement 1.** Colocalization trajectories show TALE-DNA binding and  
739 unbinding events.

740 **Figure supplement 2.** Bound and unbound lifetimes of 16- and 12-repeat TALE  
741 proteins are consistent with multiphasic binding and unbinding.

742 **Figure supplement 3.** Distance estimates between labeling sites for  $\text{NcTALE}_8$  and  
743  $\text{NcTALE}_{16}$  and the 5' ends of bound DNA.

744

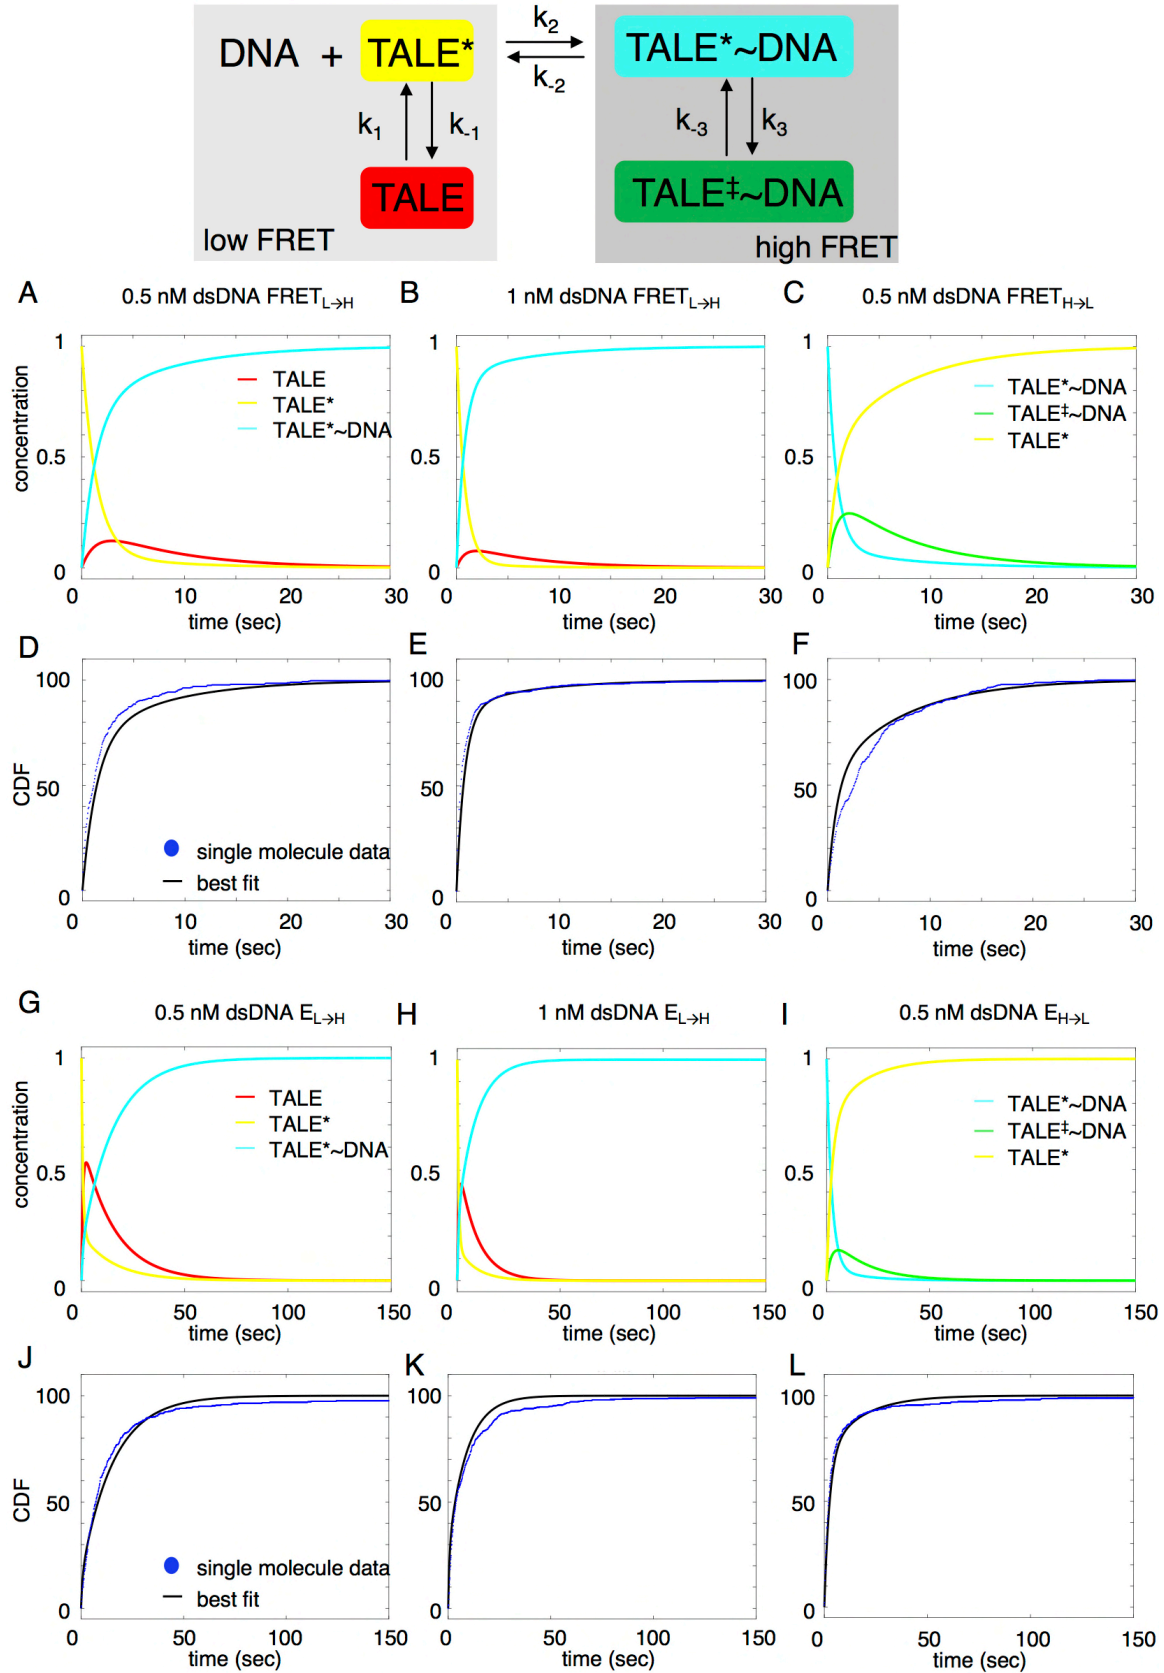

745

746 **Figure 5. Deterministic simulations provide evidence for conformational**  
747 **heterogeneity in the unbound state.** The model most consistent with data is shown at  
748 the top. Unbound TALEs can exist in DNA-binding competent (TALE<sup>\*</sup>) or DNA-binding  
749 incompetent (TALE) states. DNA-bound TALEs can exist in short-lived (TALE<sup>\*</sup>~DNA) or  
750 long-lived (TALE<sup>‡</sup>~DNA) DNA-bound states. Cumulative distributions of dwell-times  
751 (shown as blue points) from 8 repeat single-molecule time trajectories (A-F) and 16  
752 repeat single-molecule time trajectories (G-L) were analyzed with the model (best-fit  
753 shown in black). (A-C and G-I) Populations of states as a function of time, generated by  
754 numerical integration in Matlab. (D-F and J-L) Cumulative distributions in blue circles  
755 and best fit lines are shown in black. Best-fit microscopic rate constants and 68%  
756 confidence intervals are listed in Table 1.  
757

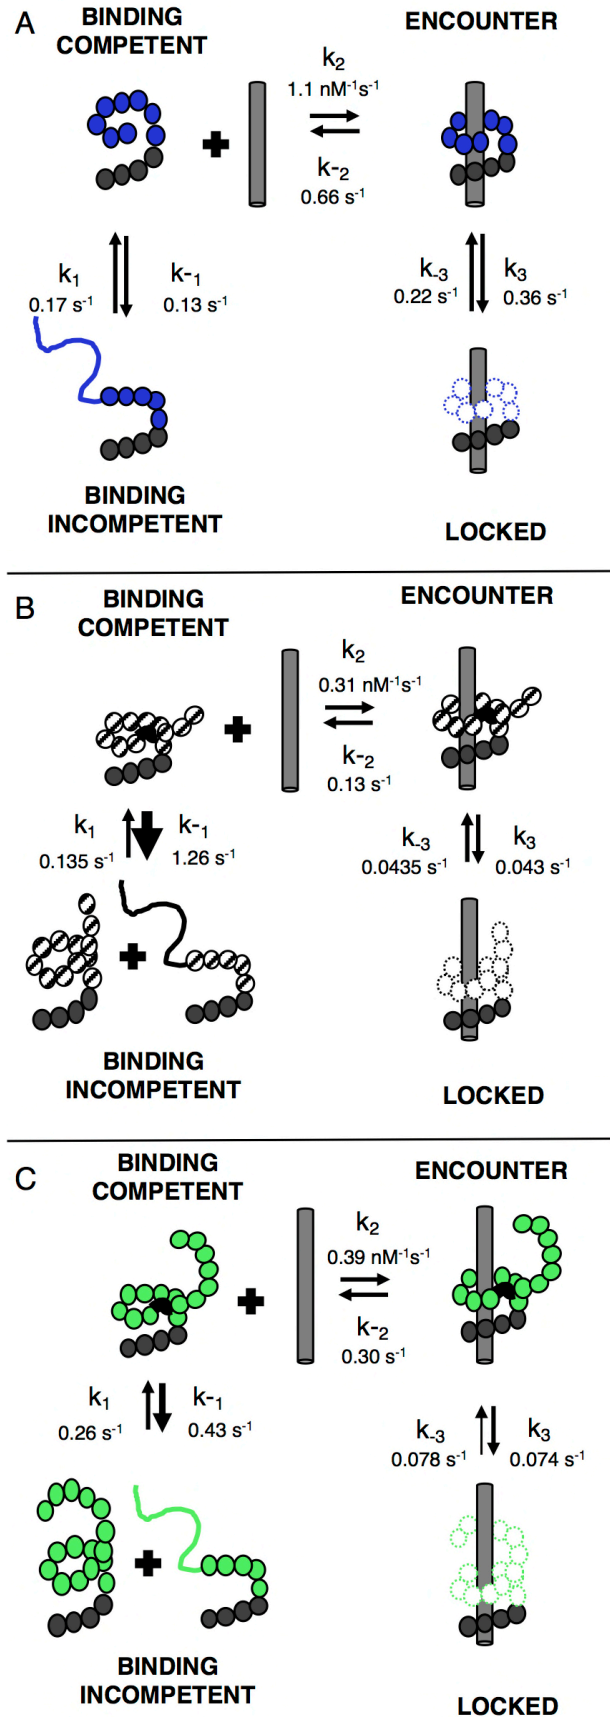



759 **Figure 6. TALEs with multiple superhelical turns must break to bind DNA.** Single-  
760 molecule FRET studies and deterministic modeling support a model where TALEs exist  
761 in four states: binding incompetent, binding competent, encounter complex, and locked.  
762 In this model, for TALEs that form less than one full superhelical turn (8 repeats, A),  
763 partly folded states are off-pathway and slow down binding. For longer TALEs that form  
764 one (12, B) or more (16, C) complete superhelical turns, partial unfolding is required for  
765 binding. DNA-bound TALEs form both encounter complexes and higher-affinity locked  
766 conformations. Dynamics of long (12 and 16-repeat; B-C) TALEs bound to DNA are  
767 significantly slower than for the shorter (8-repeat; A) TALE.

768 **Figure supplement 1.** Urea and destabilizing mutations decrease apparent binding rate  
769 of cTAL<sub>E8</sub>.

770

**Table 1. Kinetic parameters obtained from deterministic simulation fits.**

|                                        | $k_1$ (sec <sup>-1</sup> ) | $k_{-1}$ (sec <sup>-1</sup> ) | $K_{eq, DNA-free}$   | $k_2$ (sec <sup>-1</sup> nM <sup>-1</sup> ) | $k_2$ (sec <sup>-1</sup> ) | $k_3$ (sec <sup>-1</sup> ) | $k_{-3}$ (sec <sup>-1</sup> ) | $K_{eq, DNA-bound}$ (nM <sup>-1</sup> ) |
|----------------------------------------|----------------------------|-------------------------------|----------------------|---------------------------------------------|----------------------------|----------------------------|-------------------------------|-----------------------------------------|
| <b>NcTALE<sub>6</sub><sup>a</sup></b>  | 0.17<br>[0.16, 0.18]       | 0.13<br>[0.12, 0.14]          | 1.32<br>[1.26, 1.39] | 1.1<br>[1.08, 1.12]                         | 0.66<br>[0.65, 0.67]       | 0.36<br>[0.35, 0.37]       | 0.222<br>[0.218, 0.227]       | 1.62<br>[1.58, 1.66]                    |
| <b>NcTALE<sub>12</sub><sup>b</sup></b> | 0.135<br>[0.133, 0.137]    | 1.26<br>[1.09, 1.34]          | 0.11<br>[0.10, 0.12] | 0.31<br>[0.28, 0.33]                        | 0.130<br>[0.129, 0.131]    | 0.043<br>[0.042, 0.044]    | 0.0435<br>[0.0428, 0.0442]    | 0.99<br>[0.97, 1.00]                    |
| <b>NcTALE<sub>16</sub><sup>a</sup></b> | 0.26<br>[0.25, 0.27]       | 0.43<br>[0.39, 0.47]          | 0.61<br>[0.57, 0.64] | 0.39<br>[0.38, 0.41]                        | 0.299<br>[0.298, 0.300]    | 0.074<br>[0.073, 0.076]    | 0.078<br>[0.076, 0.079]       | 0.96<br>[0.95, 0.97]                    |

68% confidence intervals shown in brackets are from 2,000<sup>a</sup> and 8,000<sup>b</sup> iterations of bootstrap analysis.

771

772 **Supplemental Material**

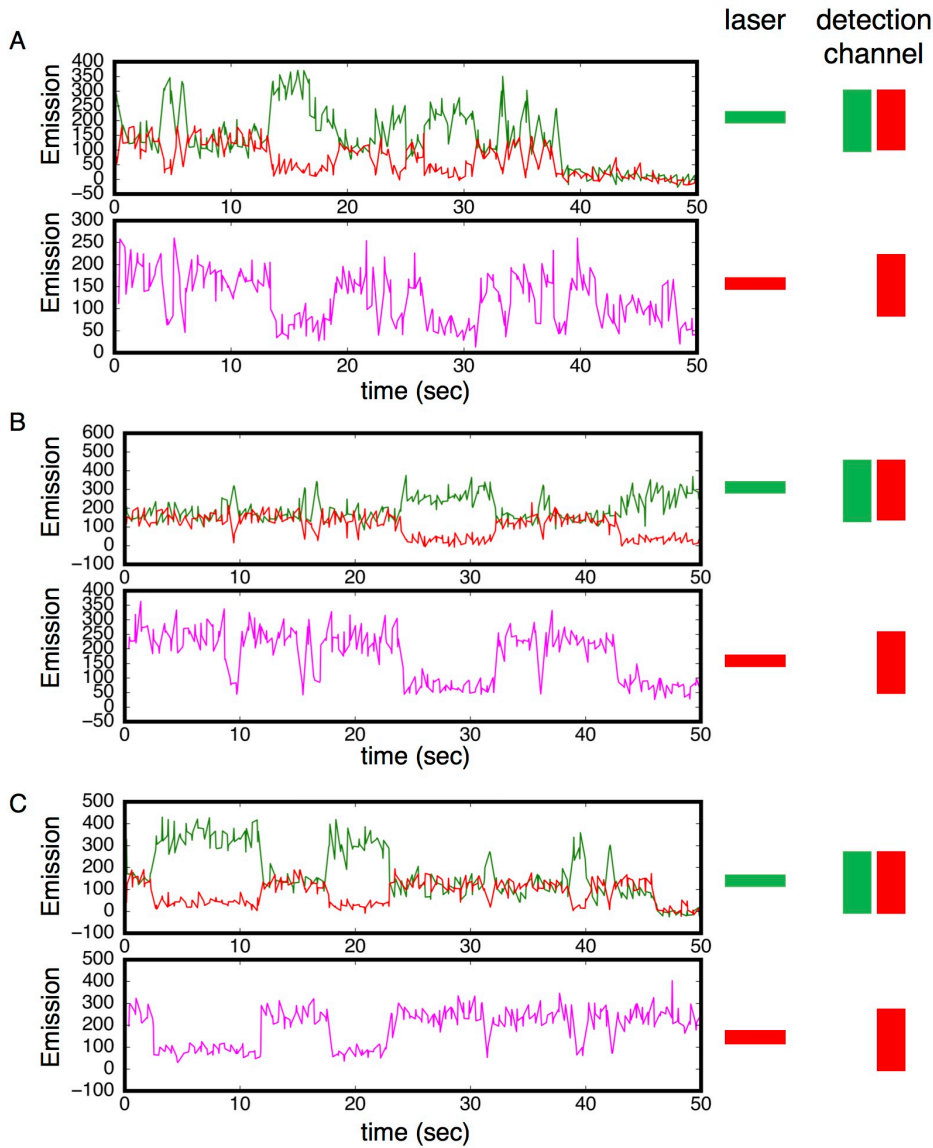

773

774 **Figure 3- figure supplement 1. Alternating laser experiments show agreement**

775 **between cTALE<sub>8</sub> FRET and colocalization kinetics.** (A-C) Three representative time

776 trajectories. In these trajectories, excitation alternated between red and green with 250

777 msec at each color. Top panels show detection of red and green light resulting from

778 green laser excitation. High red (and low green) fluorescence result from FRET. Lower

779 panels show detection of red light resulting from red laser excitation. There is strong

780 correlation between periods of high FRET in the upper panels (high red fluorescence,  
781 low green fluorescence) and periods of high red fluorescence (from DNA binding) in the  
782 lower panel. Conditions: 200 mM KCl, 20 mM Tris pH 8.0.  
783

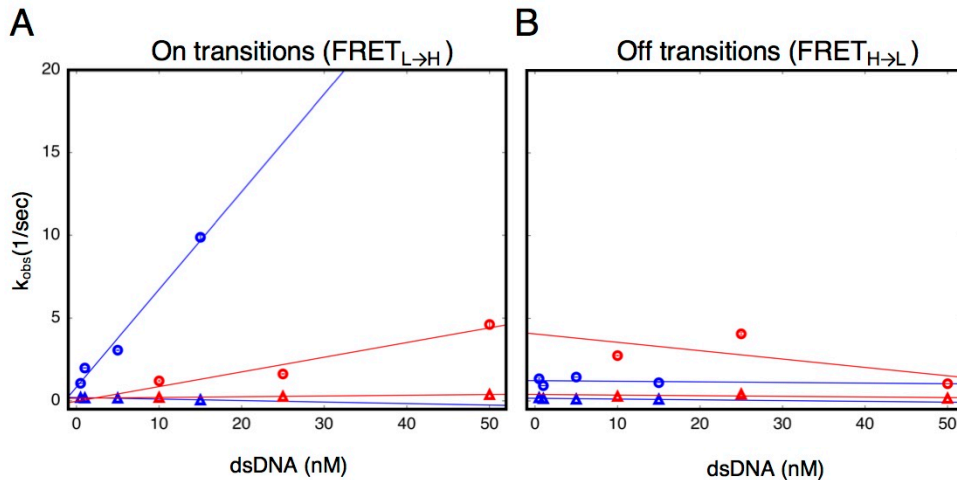

784

785 **Figure 3 – figure supplement 2. cTALEs do not slide onto ends of short dsDNA.**

786 Apparent association and dissociation rate constants as a function of DNA

787 concentration for an 8 repeat cTALE array (NcTALE<sub>8</sub>) binding to uncapped (blue) and

788 capped (red) DNA, measured by single molecule FRET dwell time analysis. (A) Rate

789 constants for conversion from the low to the high FRET state (FRET<sub>L→H</sub>). Rate

790 constants for the faster phase increase with DNA concentration (circles), indicating a

791 bimolecular event. The DNA concentration-dependence is stronger (larger slope,  $k=0.59$

792  $\pm 0.08 \text{ nM}^{-1} \text{ sec}^{-1}$ ) with uncapped DNA than with capped DNA ( $k=0.09 \pm 0.05 \text{ nM}^{-1} \text{ sec}^{-1}$ ),

793 which is likely a result of the faster diffusion of small, uncapped DNA (10 kDa)

794 compared to large, capped DNA (320 kDa). Rate constants for the slower phase are not

795 DNA-concentration dependent (triangles). (B) Rate constants for conversion from the

796 high to the low FRET state (FRET<sub>H→L</sub>). Neither phase shows a DNA concentration

797 dependent, indicating unimolecular steps. Conditions: 200 mM KCl, 20 mM Tris pH 8.0.

798

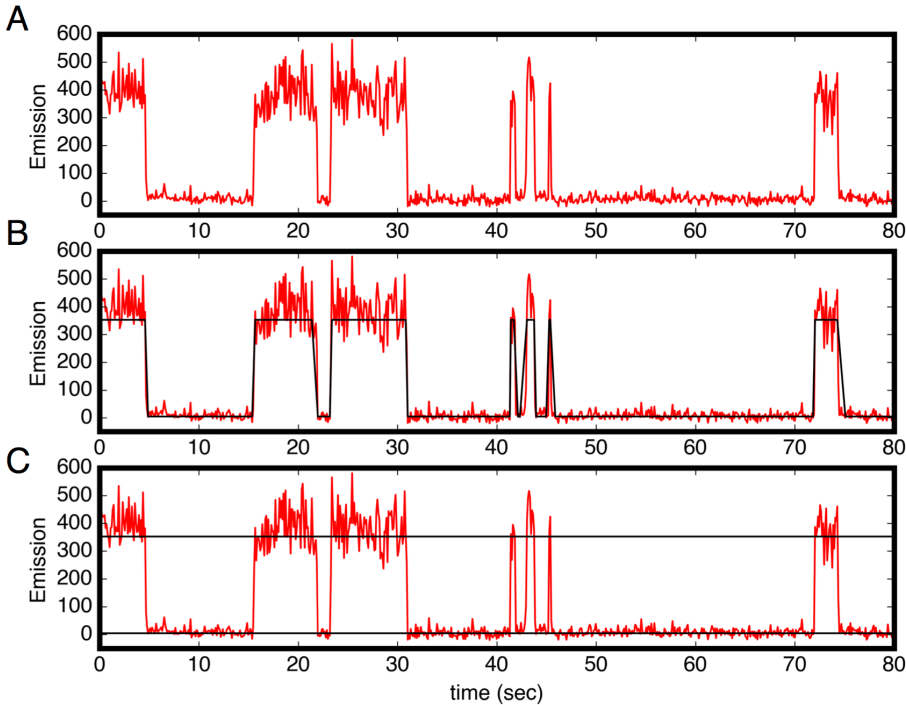

799

800 **Figure 4- figure supplement 1. Colocalization trajectories show TALE-DNA**

801 **binding and unbinding events.** (A-C) One representative time trajectory and

802 colocalization analysis for a sixteen repeat TALE, NcTALE<sub>16</sub>, incubated with 1 nM Cy5-

803 A<sub>15</sub>/T<sub>15</sub>. In the colocalization protocol, both the green and red lasers were used in the

804 first ten frames (not shown) to identify single molecule locations. For all subsequent

805 frames, Cy5-labeled DNA was continuously excited with the red laser. Red light

806 emission images (from Cy5) were collected with time steps of 100 msec. Trajectories

807 were generated from sites of red/green colocalization in the first ten frames, and were

808 corrected for background Cy5 emission (red trajectories above). For each trajectory, we

809 set two thresholds for low and high Cy5 emission (C). A molecule is designated to be in

810 the high emission (DNA-bound) state above the high threshold, and in the low emission

811 state below the low threshold. From this state-assignment procedure, dwell-times were

812 determined in the high (bound) and low (unbound) states (C). Conditions: 200 mM KCl,

813 20 mM Tris pH 8.0.

814

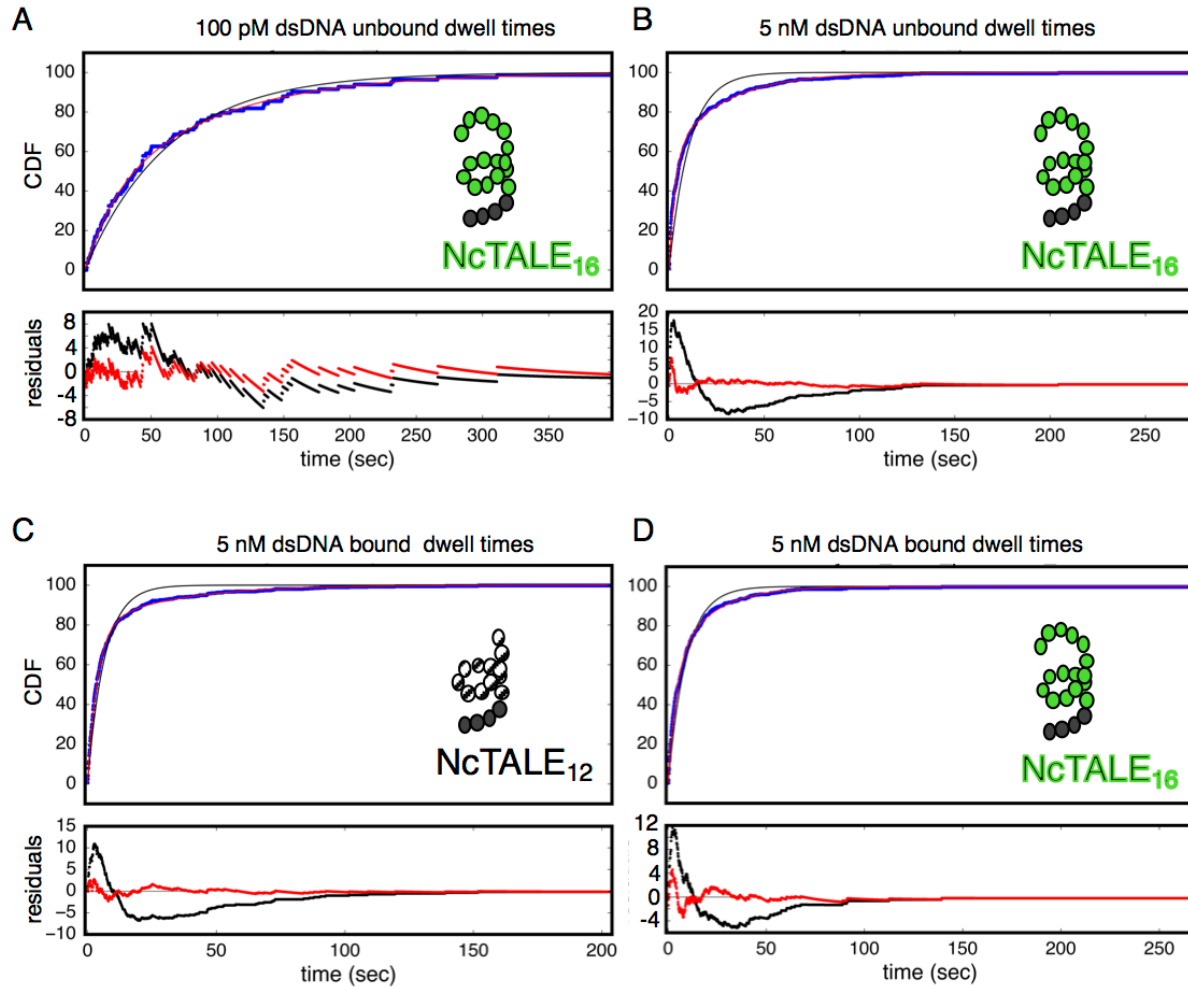

815

816 **Figure 4- figure supplement 2. Bound and unbound lifetimes of 16- and 12-repeat**

817 **TALE proteins are consistent with multiphasic binding and unbinding. (A, B)**

818 Cumulative distributions of low-FRET dwell times (blue circles) for a 16-repeat construct

819 at low and high DNA concentration. Fits to single-exponentials (black) show large

820 nonrandom residuals (lower panels) which are most pronounced at high DNA

821 concentrations, consistent with the binding heterogeneity observed in eight repeat

822 cTALEs (Figure 3). Double-exponentials (red) give smaller, more uniform residuals. (C,

823 D) Cumulative distributions of high-FRET dwell times (blue circles) for 16- and 12-



824 repeat constructs at high DNA concentration. Fits to single-exponentials (black) show  
825 large nonrandom residuals (lower panels), consistent with the dissociation  
826 heterogeneity observed in eight repeat cTALEs. Double-exponentials (red) give smaller,  
827 more uniform residuals.  
828

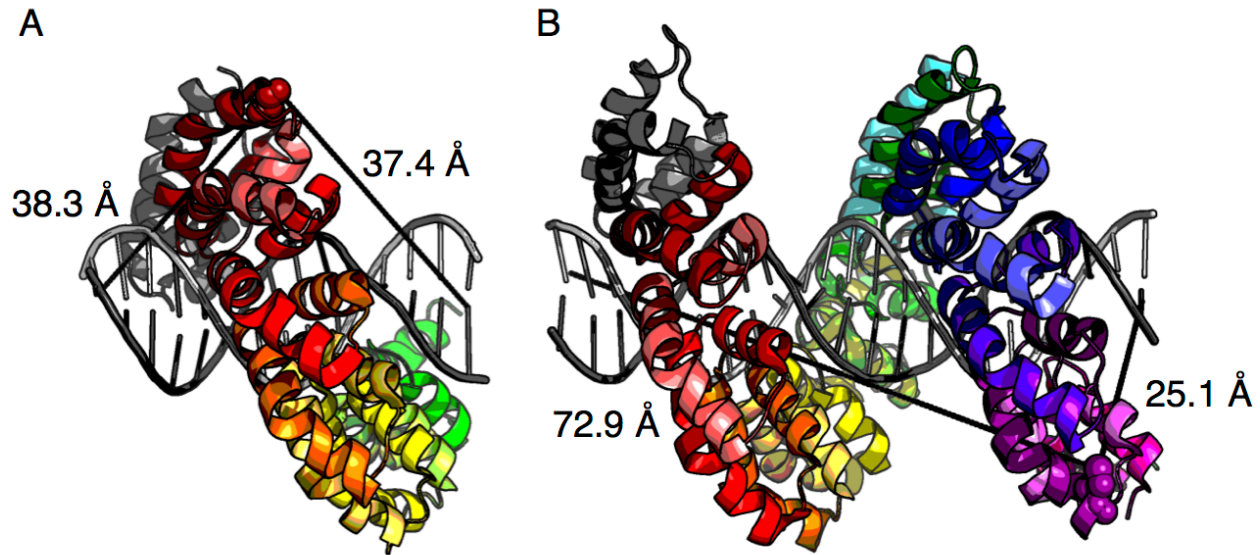

829

830 **Figure 4- figure supplement 3. Distance estimates between labeling sites for**

831 **NcTALE<sub>8</sub> and NcTALE<sub>16</sub> and the 5' ends of bound DNA.** The crystal structure of

832 PthXo1 (PDB: 3UGM) (Mak et al., 2012) in complex with DNA (colored by repeat) as a

833 model of donor-acceptor fluorophore distances. (A) The distance from C30 in the first

834 repeat (the site of labelling in NcTALE<sub>8</sub>) to the 5' base of the sense strand (light grey) is

835 38.3 Å; the distance to the 5' base of the antisense strand (dark grey) is 37.4 Å. (B) The

836 distance from C30 in the fourteenth repeat (the site of labelling in NcTALE<sub>16</sub>) to the 5'

837 base of the sense strand (light grey) is 72.9 Å; the distance to the 5' base of the

838 antisense strand (dark grey) is 25.1 Å. Note that although there is likely to be some

839 variation these distances since the DNAs used here are longer (15 and 23 bases) than

840 the TALE arrays (8 and 16 repeats, each with a four-repeat N-capping domain), the

841 differences in donor-acceptor distances for the 16 repeat construct (B) are likely to be

842 robust to registry shifts of a few bases.

843

844

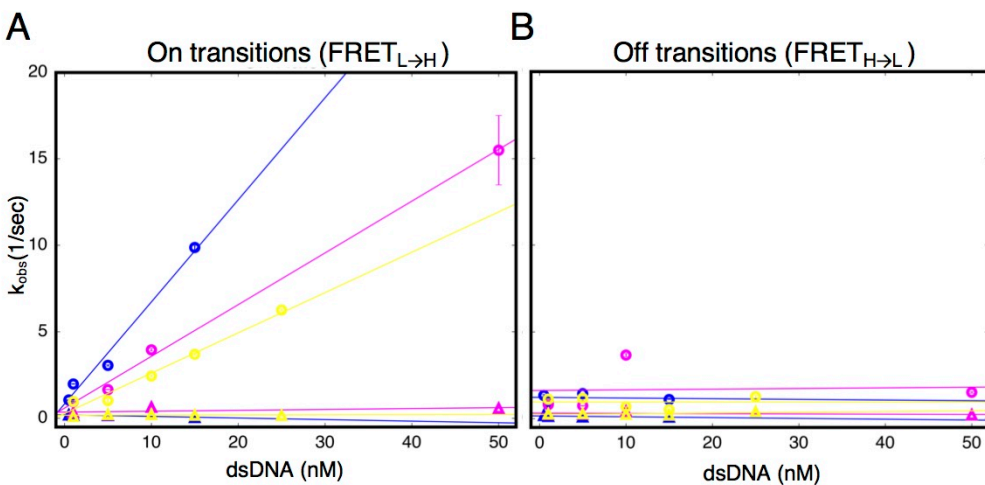

845

846 **Figure 6- figure supplement 3 1. Urea and destabilizing mutations decrease**  
847 **apparent binding rate of cTALE<sub>8</sub>.** (A) Apparent association rate constants as a  
848 function of DNA concentration for an 8 repeat cTALE in 0 M urea (blue), 1 M urea  
849 (pink), and with destabilizing point mutations (yellow; mutations substitute leucine at  
850 position 1 in the fourth repeat with a glycine). The DNA concentration dependence is  
851 strongest (steepest slope) in the absence of urea and destabilizing point substitutions  
852 (circles). Rates in the slower phase (triangles) appear unaffected by urea or mutational  
853 destabilization. (B) Apparent dissociation rate constants as a function of DNA  
854 concentration (phase 1 shown in circles, and phase 2 shown in triangles). Rates in the  
855 both phases appear unaffected by urea and mutational destabilization. Conditions: 200  
856 mM KCl, 20 mM Tris pH 8.0.

857

858 **Source Data**

859 **Figure 3- source data 1. List of values used to construct long time trajectories.**

860 Long time trajectories showing transitions between low- and high-FRET states

861 (efficiencies of 0 and 0.45) for 1 nM dsDNA (source data 1A) and 15 nM dsDNA (source

862 data 1B) depicted in Figure 3A-B.

863 **Figure 3- source data 2. List of values used to construct CDFs.** Cumulative

864 distributions of low-FRET (source data 2A) and high-FRET (source data 2B) dwell times

865 depicted in Figure 3C-D.
